# Supplementary material for: Why observed and modelled ozone production rates and sensitives differ, a case study at rural site in China
Source: Copernicus journal article supplement (doi:10.5194/acp-26-1889-2026), 2026-02-06
Supplement: Supplementary file 1 [file acp-26-1889-2026-supplement.pdf]

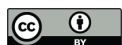

*Supplement of*

## **Why observed and modelled ozone production rates and sensitivities differ, a case study at rural site in China**

**Jun Zhou et al.**

*Correspondence to:* Jun Zhou (junzhou@jnu.edu.cn) and Min Shao (mshao@jnu.edu.cn)

The copyright of individual parts of the supplement might differ from the article licence.

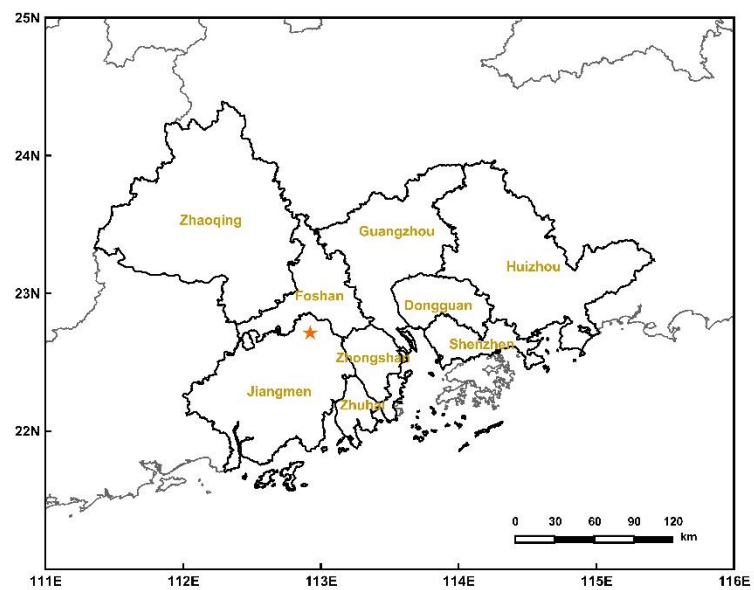

**Figure S1: Map of the Pearl River Delta showing the location of the Guangdong Atmospheric Supersite of China (112.93°E, 22.73°N). Created using MeteoInfo v3.6.2.**

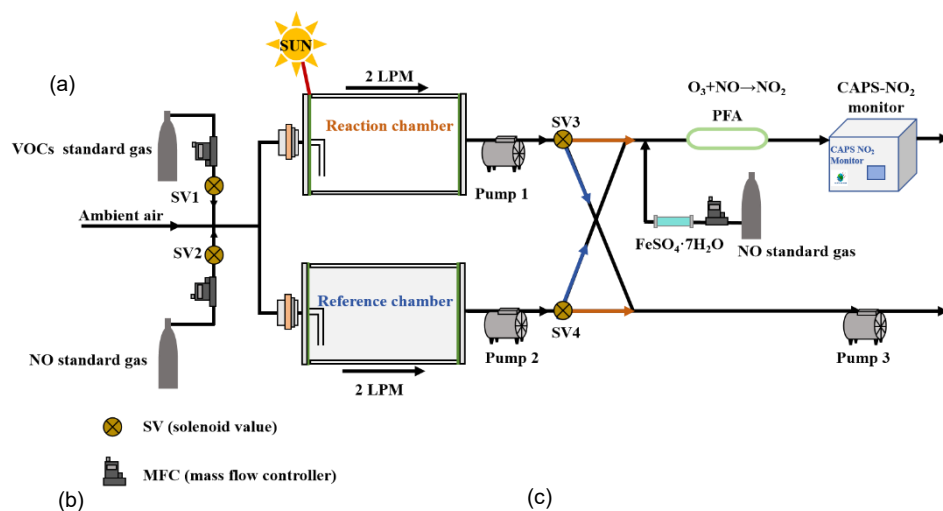

(b)

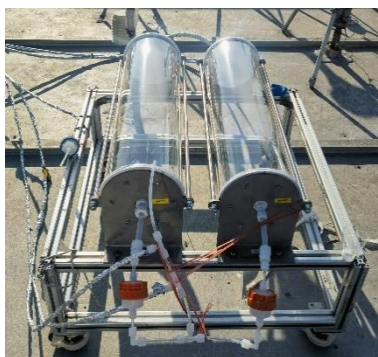

(c)

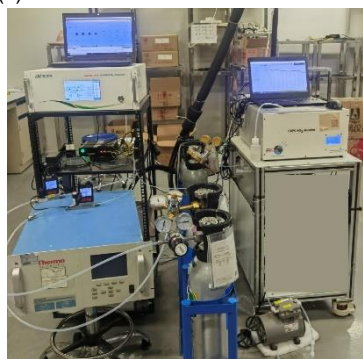

**Figure S2: Schematic (a) and actual image (b–c) of the NPOPR detection system; (b) outdoor section of the NPOPR detection system; (c) indoor section of the NPOPR detection system.**

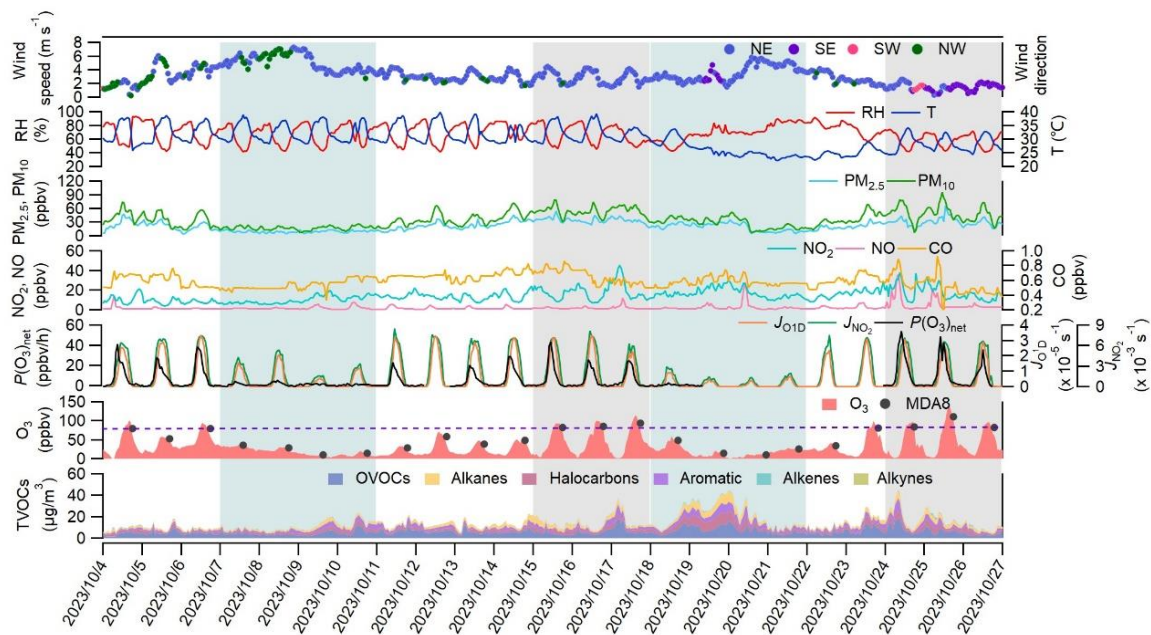

**Figure S3:** The time series of ozone, its precursors, meteorological parameters, and  $P(\text{O}_3)_{\text{net\_Mea}}$  (measured  $P(\text{O}_3)_{\text{net}}$ ) at Guangdong Atmospheric Supersite of China from October 4 to October 20, 2023). The blue and gray shaded areas represent rainy days and  $\text{O}_3$  pollution days, respectively.

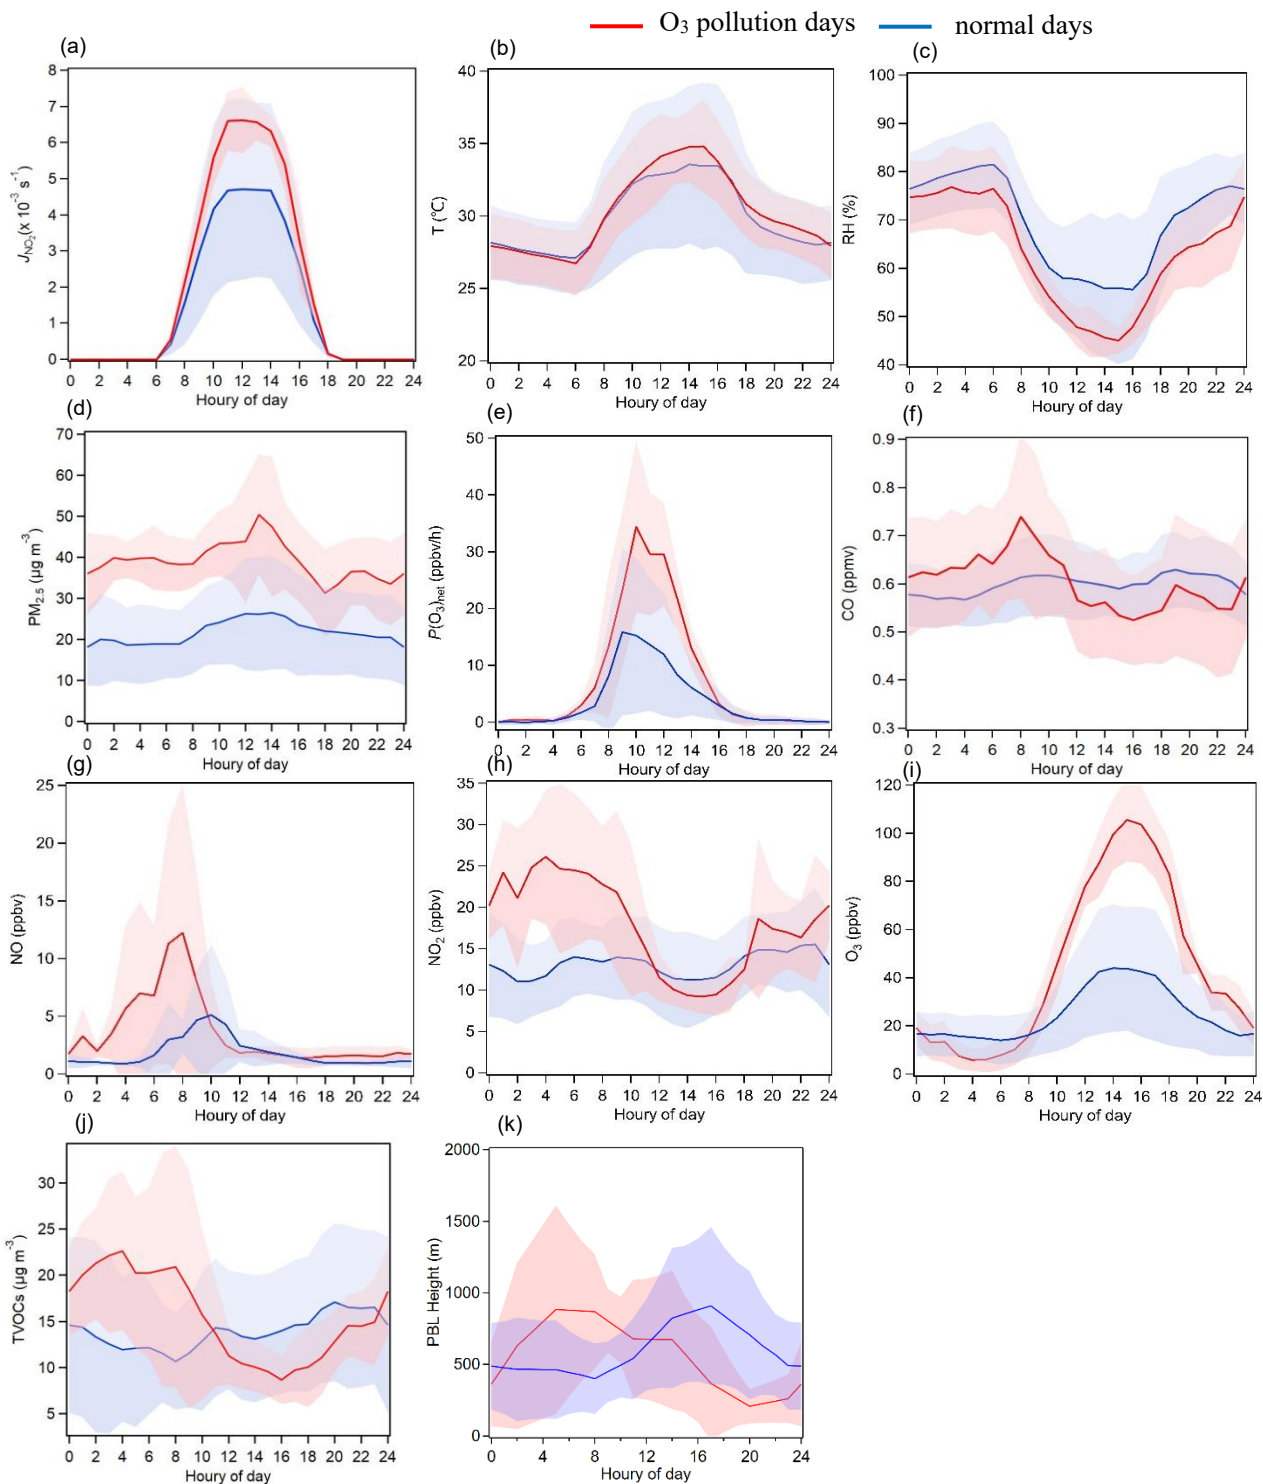

**Figure S4: Diurnal variation of pollutant concentrations and meteorological parameters during the observation period. Red solid line: O<sub>3</sub> pollution days; blue solid line: normal days.**

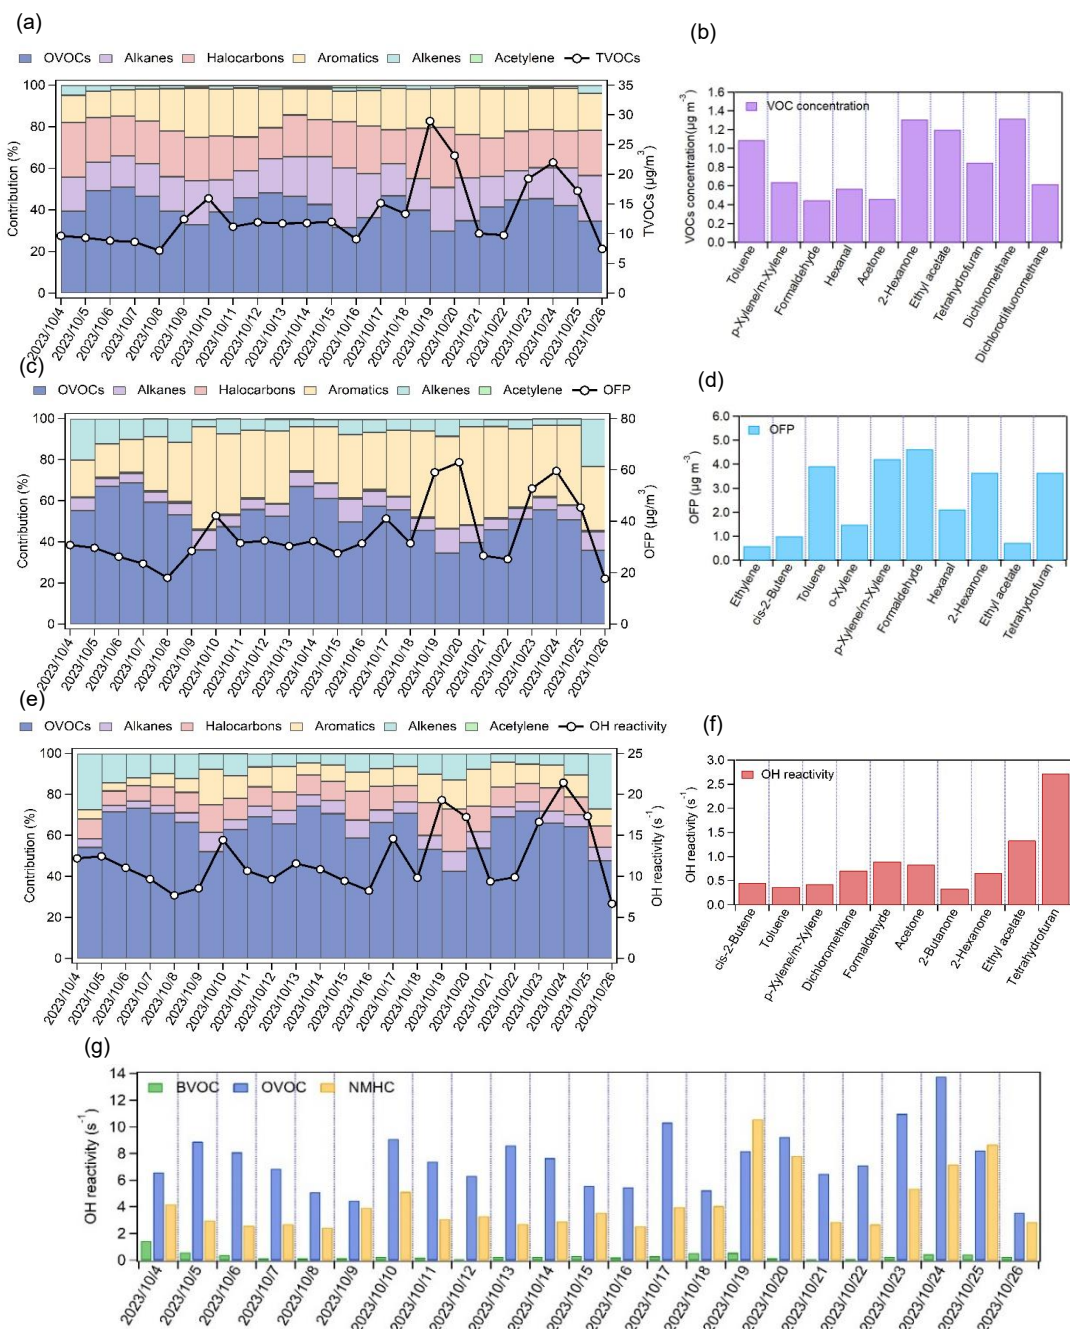

**Figure S5:** Daily contributions of VOC categories (OVOCs, alkanes, halocarbons, aromatics, alkenes, and alkynes) to (a) VOCs concentration, (b) total OH reactivity ( $k_{\text{OH}}$ ), and (c) O<sub>3</sub> formation potential (OFP) during the observation period. (d), (e), and (f) represent the top 10 contributing species for VOCs concentration,  $k_{\text{OH}}$ , and OFP, respectively. (g) daytime average concentration of different VOC categories (BVOCs, OVOCs, and NMHC) during the observation period.



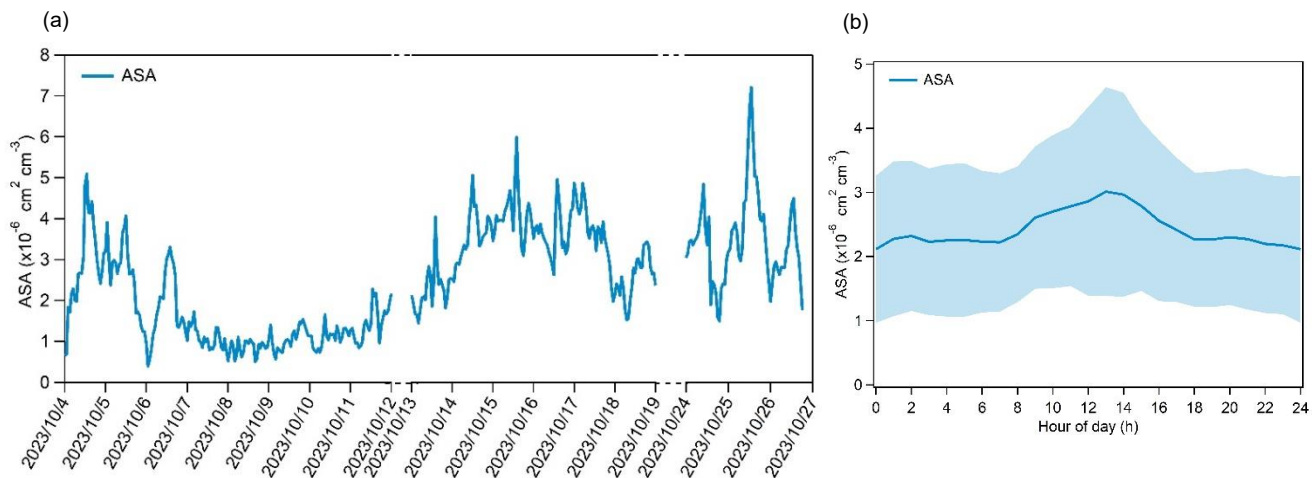

Figure S6: (a) Time series and (b) diurnal variation of aerosol surface area during the observation period.

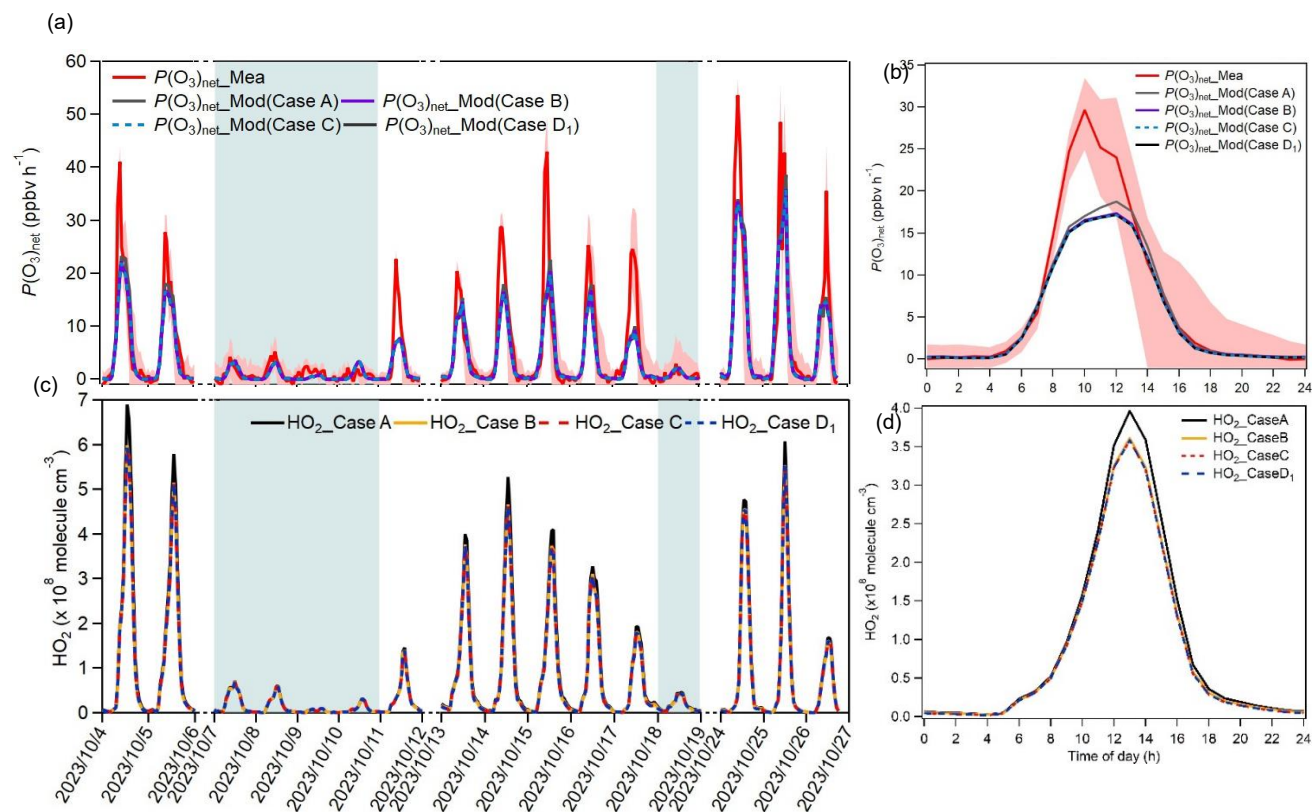

Figure S7: Time series and diurnal variations of (a)–(b)  $P(\text{O}_3)_{\text{net}}$  (Case A–D<sub>1</sub>) and (c)–(d)  $\text{HO}_2$  (Case A–D<sub>1</sub>) during the observation period. The diurnal variations were calculated by excluding rainy days, which are marked as the shaded areas in (a) and (c).

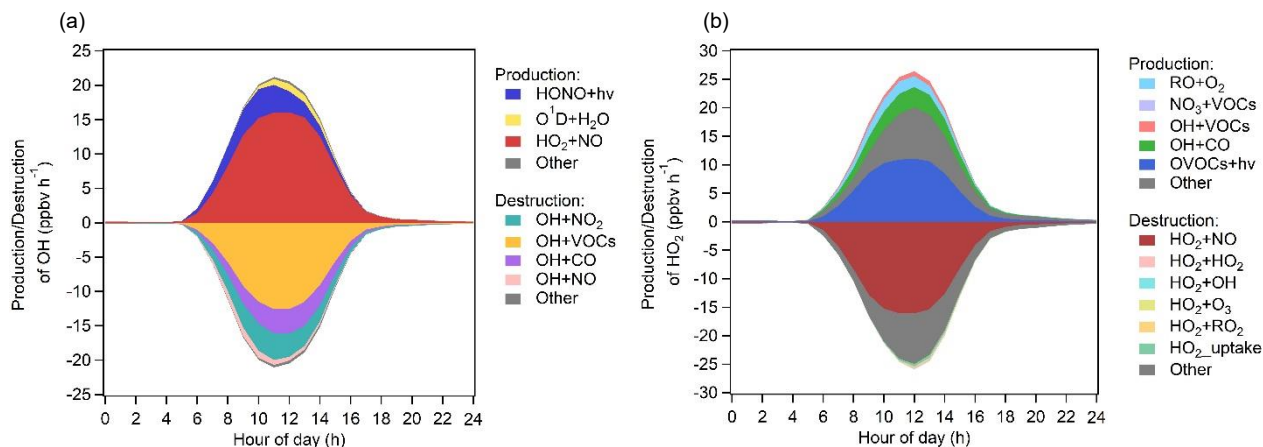

Figure S8: The chemical budget of (a) OH and (b) HO<sub>2</sub> simulated in Case D1.

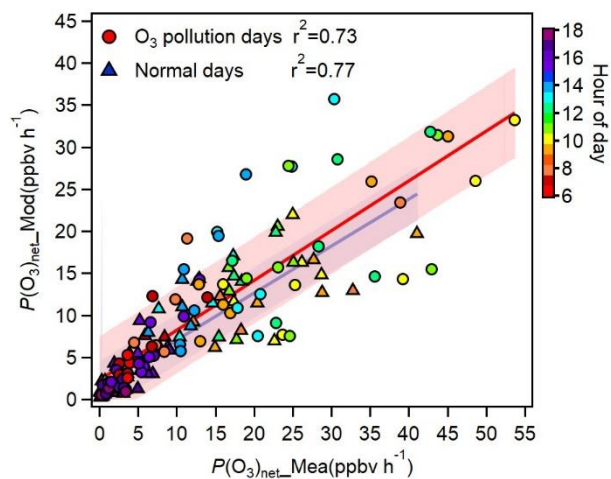

Figure S9. Correlations between simulated ( $P(O_3)_{\text{net\_Mod}}$ ) and measured ( $P(O_3)_{\text{net\_Mea}}$ )  $P(O_3)_{\text{net}}$  on O<sub>3</sub> pollution days and normal days.



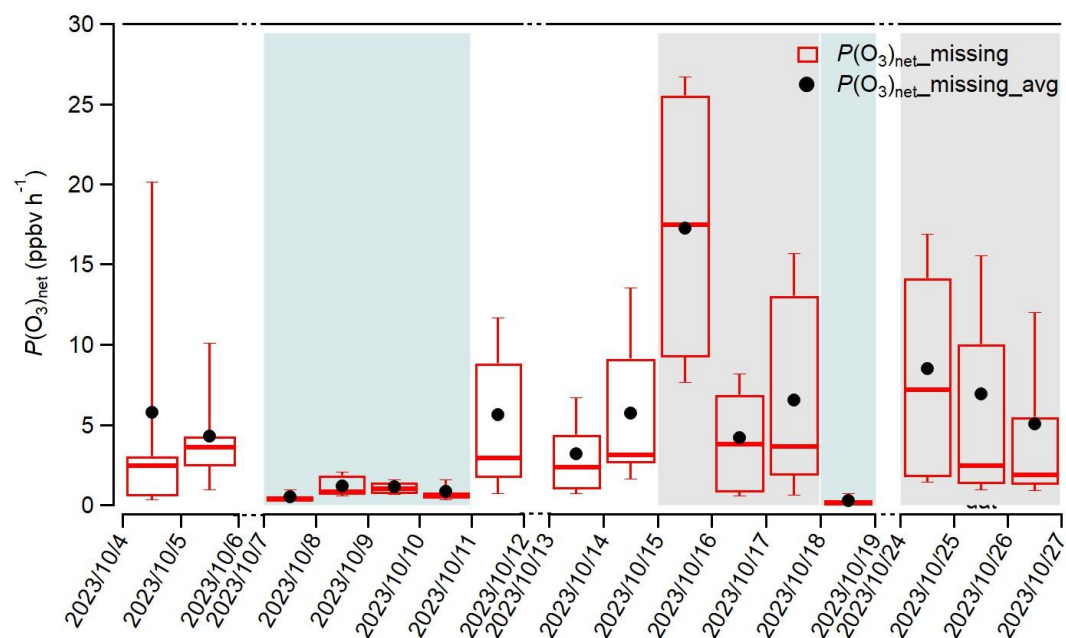

Figure S10: Box plots of  $P(\text{O}_3)_{\text{net\_missing}}$  (Case D1) on each day during the observation period. The box boundaries represent the 10th and 90th percentiles; the midline indicates the 50th percentile, and the black dots denote the daily average values of  $P(\text{O}_3)_{\text{net\_missing}}$ . The blue and gray shaded areas represent rainy days and O<sub>3</sub> pollution days, respectively.

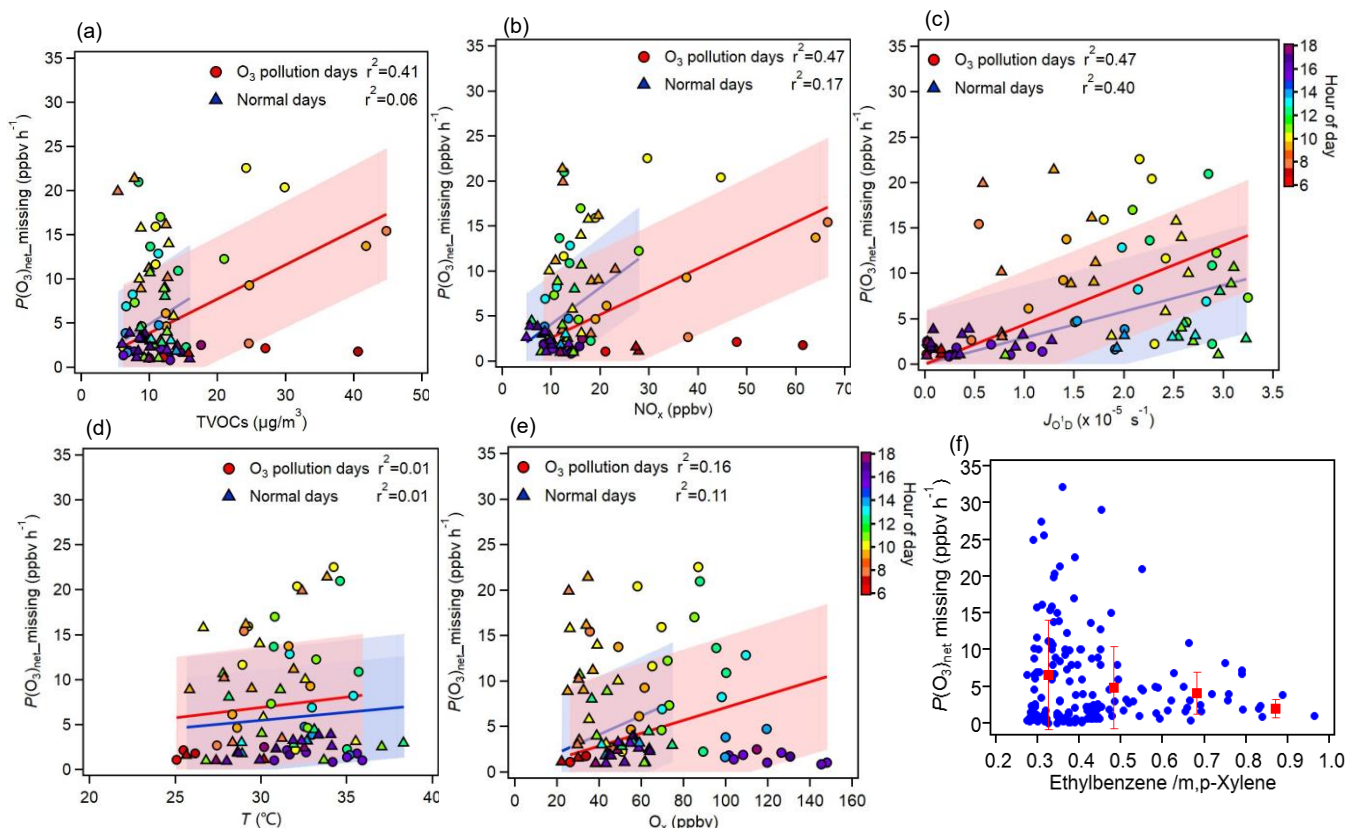

**Figure S11: Correlations between  $P(O_3)_{net\_missing}$  and TVOCs, NO<sub>x</sub>,  $J_{O_1D}$ , T, O<sub>3</sub> (a–e), and the ethylbenzene/m,p-Xylene ratio (f, representing the air mass aging). Circles represent O<sub>3</sub> pollution days, triangles represent normal days, and the shaded area indicates the 68.3 % confidence interval of the fitting line.**

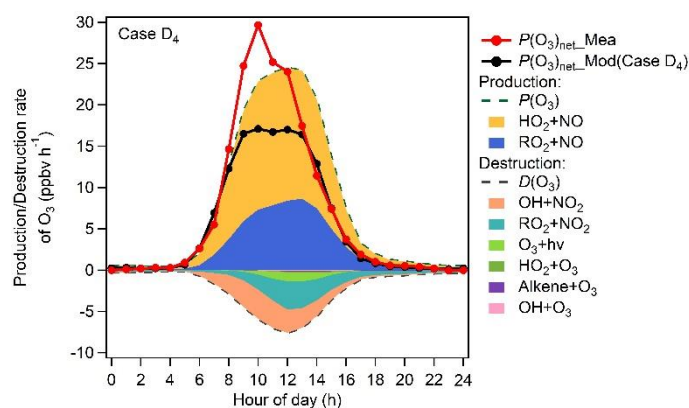

**Figure S12: Diurnal variations of measured  $P(O_3)_{net}$  values, simulated values under Case D<sub>4</sub> scenario, and different pathways of O<sub>3</sub> production and destruction. Diurnal variations were calculated by excluding rainy days.**

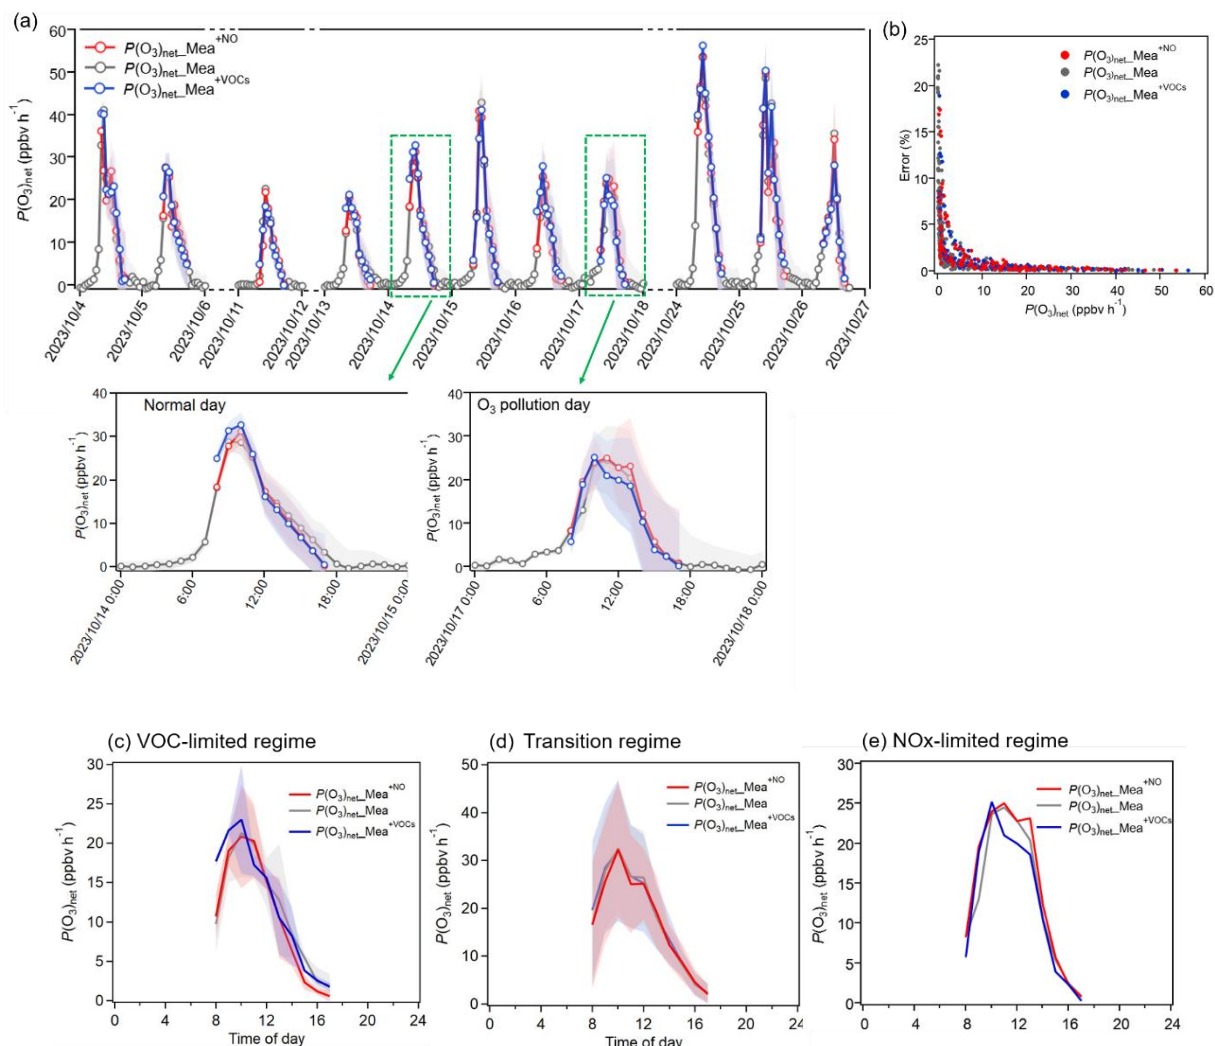

**Figure S13: (a)** Time series of measured  $P(O_3)_{net\_Mea}$ ,  $P(O_3)_{net}^{+NO}$  and  $P(O_3)_{net}^{+VOCs}$  based on sensitivity experiments using the NPOPR detection system, with an enlarged view for an  $O_3$  pollution day (October 26, 2023) and a normal ( $O_3$  non-pollution) day (October 14, 2023). The shaded areas represent the errors of each measured term, calculated from the instrument measurement uncertainties given in Hao et al. (2023); **(b)** Relative errors of measured  $P(O_3)_{net\_Mea}$ ,  $P(O_3)_{net}^{+NO}$ , and  $P(O_3)_{net}^{+VOCs}$  as a function of their measured values; **(c-e)** Mean diurnal profiles of the three  $O_3$  formation regimes identified: eight days classified as transition regime (4-5, 11, 14-15, 24-26 October 2023), two as VOC-limited regime (13 and 16 October 2023), and one as  $NO_x$ -limited regime (17 October 2023).

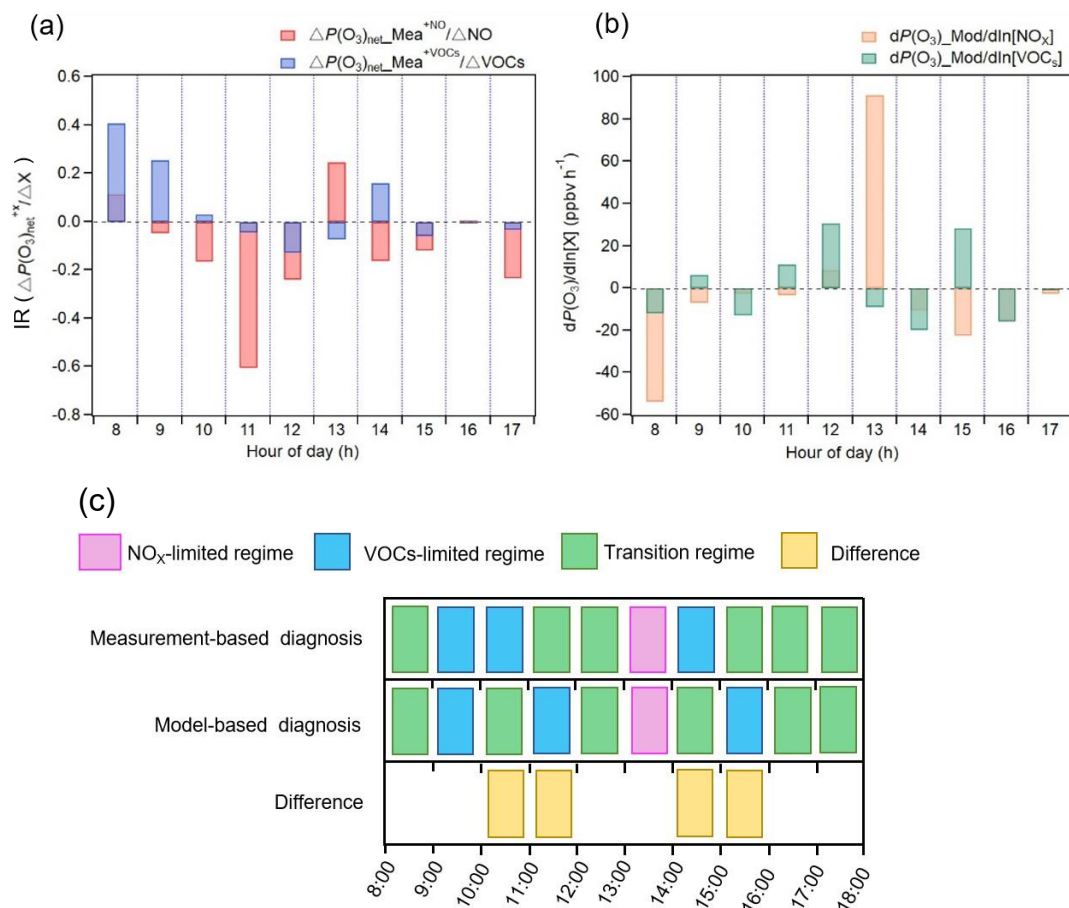

**Figure S14: Diurnal variations of  $P(O_3)_{net}$  and OFS diagnosis results. (a) direct measurement IR indices ( $\Delta P(O_3)_{net}^{+NO}$  and  $\Delta P(O_3)_{net}^{+VOCs}$  measured by the NPOPR detection system); (b) absolute  $P(O_3)_{net}$  sensitivity of  $NO_x$  and VOCs calculated based on the OBM model (Case D<sub>1</sub>); (c) OFS diagnosis results and differences between direct measurements (a) and model simulations (b).**

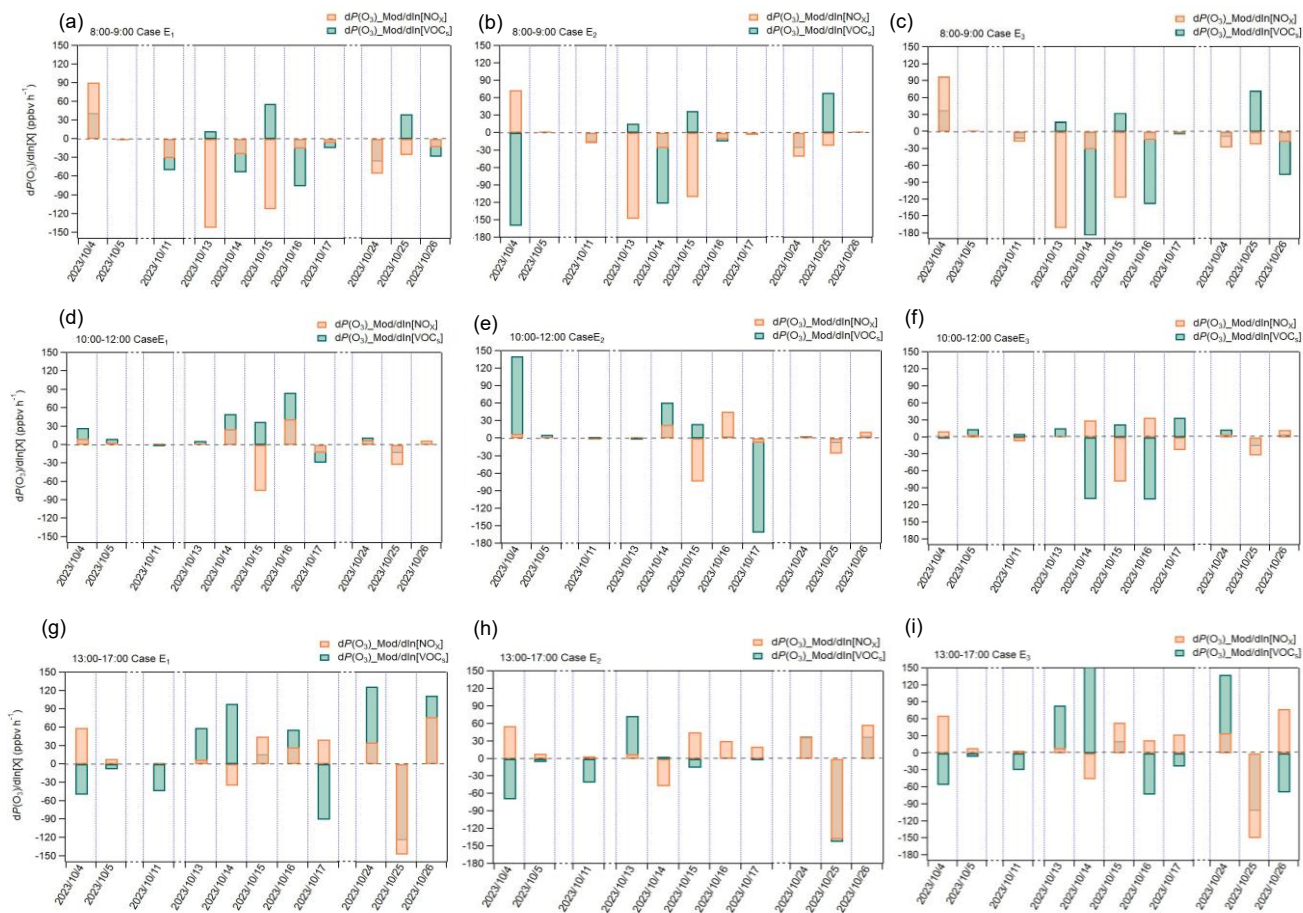

**Figure S15: Diurnal cumulative average results of the absolute  $P(\text{O}_3)_{\text{net}}$  sensitivity calculated from the box model (Case  $E_1$ – $E_3$ ). (a)–(c)  $P(\text{O}_3)_{\text{net}}$  rising phase (8:00–9:00); (d)–(f)  $P(\text{O}_3)_{\text{net}}$  stable phase (10:00–12:00); (g)–(i)  $P(\text{O}_3)_{\text{net}}$  declining phase (13:00–17:00).**

### **S1. Measurement error of $P(O_3)_{\text{net}}$ of the NPOPR detection system**

We have thoroughly described the measurement error of  $P(O_3)_{\text{net}}$  of the NPOPR detection system in our previous study (Hao et al., 2023; Zhou et al., 2024b). The measurement error of  $P(O_3)_{\text{net}}$  depends on the estimation error of  $O_x$  in the reaction and reference chambers, which includes the measurement error of  $O_x$  of CAPS- $NO_2$  monitor and the error caused by the light-enhanced loss coefficient of  $O_3$  ( $\gamma$ ), which can be calculated as follows:

$$(O_x)_{\text{error}} = \sqrt{(O_{x_\gamma})_{\text{error}}^2 + (O_{x\text{CAPS}})_{\text{error}}^2} \quad (S1)$$

where  $(O_x)_{\text{error}}$  represents the absolute error in the estimated  $O_x$  concentration in the reaction and reference chambers, which results from the quadratic propagation of the absolute errors  $(O_{x_\gamma})_{\text{error}}$  and  $(O_{x\text{CAPS}})_{\text{error}}$ . Here,  $(O_{x\text{CAPS}})_{\text{error}}$  signifies the measurement error of the  $O_x$  measured by the CAPS- $NO_2$  monitor, while  $(O_{x_\gamma})_{\text{error}}$  denotes the error associated with the  $\gamma$ -corrected  $O_x$  of the chambers, where  $\gamma$  represent the light-enhanced  $O_3$  loss coefficient.

To get  $(O_{x\text{CAPS}})_{\text{error}}$ , we calibrated the CAPS- $NO_2$  monitor as follows: a. injected  $\sim 10$ – $100$  ppbv of  $NO_2$  for 30 minutes to passivate the surfaces of the monitor and then injecting ultrapure air for  $\sim 10$  minutes to ensure the zero point did not drift, according to the ultrapure air condition, the LOD of CAPS was 0.88 and 0.02 ppbv ( $3\sigma$ ) at an integration time of 35 and 100 s, respectively; b. injected a wide range of  $NO_2$  concentration (from 0–160 ppbv) prepared from a  $NO_2$  standard gas (with the original concentration of 2.08 ppmv) mixed with ultrapure air into the CAPS- $NO_2$  monitor, repeated the experiments for three times at each  $NO_2$  concentration, the final results are shown in Fig. S16.

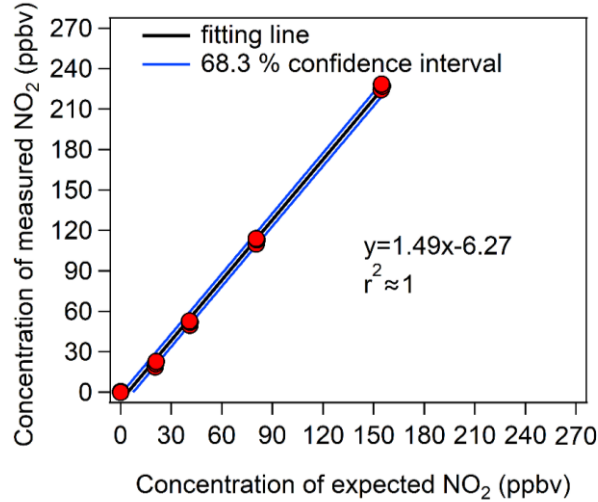

**Figure S16: Calibration results of the CAPS  $NO_2$  monitor at different  $NO_2$  mixing ratios. The y-axis represents the  $NO_2$  mixing ratios measured by the CAPS  $NO_2$  monitor, and the x-axis represents the prepared  $NO_2$  mixing ratios prepared from the diluted  $NO_2$  standard gas.**

We fitted the calibration results with a 68.3 % confidence level, and the blue line in Fig. S16 represents the maximum fluctuation range under this confidence level,  $(O_{x\text{CAPS}})_{\text{error}}$  was then calculated from the fluctuation range of the 68.3 % confidence interval of the calibration curve, the relationship between the  $(O_{x\text{CAPS}})_{\text{error}}$  and the measured  $O_x$  value ( $[O_x]_{\text{measured}}$ )



can be expressed as a power function curve, as shown in Eq. (S2) :

$$(O_{XCAPS})_{\text{error}} = 9.72 \times [O_X]_{\text{measured}}^{-1.0024} \quad (\text{S2})$$

We acknowledge that this power function has been derived from calibration data of the  $O_X$  concentrations ranged from 20 ppbv to 160 ppbv. Utilizing this function outside this calibrated range, especially at very low  $O_X$  concentrations, may result in errors that are disproportionately large and may not accurately capture the true variability of the measurement errors. In this study, the  $O_X$  concentrations ranged from 18 to 148 ppbv, which falls into the calibration range. Consequently, this power function is deemed appropriate for estimating the  $(O_{XCAPS})_{\text{error}}$  throughout the whole measurement period.

$(O_{X\gamma})_{\text{error}}$  was derived from the light-enhanced loss of  $O_3$  in the reaction and reference chambers at  $2.1 \text{ L min}^{-1}$ , the flow rate used during the observation campaign. To establish the calibration curve, we performed an outdoor experiment:  $O_3$  ( $\sim 130$  ppbv), produced by an  $O_3$  generator (P/N 97-0067-02, Analytic Jena US, USA), was induced into the two chambers. Zero air was co-injected with the  $O_3$  to suppress any photochemical  $O_3$  production outdoors. This setup allowed us to monitor daytime changes in the photolysis frequencies of various species. We simultaneously recorded  $J(O^1D)$ ,  $T$ , RH,  $P$  and  $O_3$  mixing ratios at the inlets and outlets of both chambers.  $T$  and RH were measured with a thermometer (Vaisala, HMP110, USA). The light-enhanced  $O_3$  loss coefficient ( $\gamma$ ) was then calculated using Eq. (S3):

$$\gamma = \frac{d[O_3] \times D}{\omega \times [O_3] \times \tau} \quad (\text{S3})$$

where  $d[O_3]$  represents the difference between the  $O_3$  mixing ratios at the inlets and outlets of both chambers (i.e., the light-enhanced  $O_3$  loss);  $D$  is the diameter of the chambers;  $\omega$  is the average velocity of  $O_3$  molecules;  $[O_3]$  is the injected  $O_3$  mixing ratio at the inlet;  $\tau$  is the average residence time of the air in the reaction and reference chambers. The relationship between  $J(O^1D)$  and  $\gamma$  is shown in Fig. S18, the obtained  $\gamma$ - $J(O^1D)$  equation was used to correct  $d[O_3]$  in both chambers during the daytime, thereby eliminating the influence of light-enhanced loss. Our previous study has shown that after this correction,  $d[O_3]$  showed no clear correlation with RH for either chamber (Hao et al., 2023), indicating that RH did not affect the  $O_3$  mixing ratio during the observation period. When quantifying  $d[O_3]$  from ambient air measurements, we first calculate  $\gamma$  from the measured  $J(O^1D)$  using the  $\gamma$ - $J(O^1D)$  equations listed in Fig. S17 for each chamber, then compute  $d[O_3]$  from the measured  $[O_3]$  and Eq. (S3).

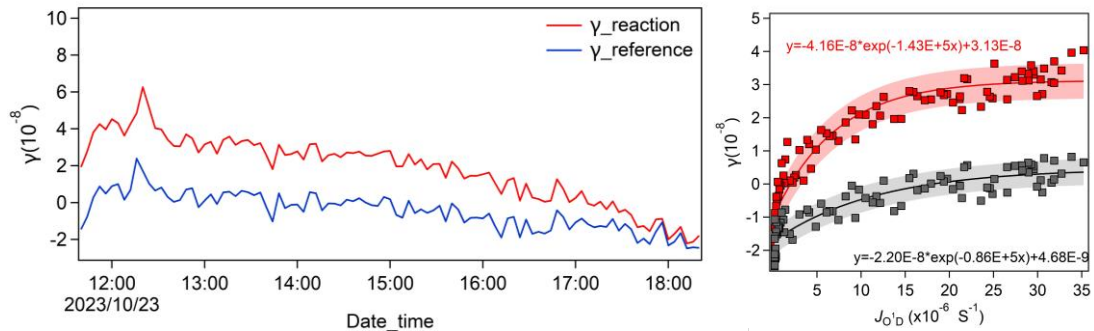

**Figure S17: The relationship between  $\gamma$  and  $J(\text{O}^1\text{D})$  in the reaction and reference chambers, the shaded areas represent the maximum range of fluctuation under this confidence level.**

When injecting ambient air into the NPOPR system, the error of  $P(\text{O}_3)_{\text{net}}$  with a residence time of  $\tau$  can be calculated using Eq. (S4):

$$P(\text{O}_3)_{\text{net\_error}} = \frac{\sqrt{(O_{X\gamma})_{\text{rea\_error}}^2 + ((9.72 \times [O_X]_{\text{rea\_measured}})^{-1.0024})_{\text{rea\_std}}^2 + (O_{X\gamma})_{\text{ref\_error}}^2 + ((9.72 \times [O_X]_{\text{ref\_measured}})^{-1.0024})_{\text{ref\_std}}^2}}{\tau} \quad (\text{S4})$$

where  $(O_{X\gamma})_{\text{rea\_error}}$  and  $(O_{X\gamma})_{\text{ref\_error}}$  represent the measurement error due to light-enhanced loss of  $\text{O}_3$  in the reaction and reference chambers, respectively, and  $((9.72 \times [O_X]_{\text{measured}})^{-1.0024})_{\text{rea\_std}}$  and  $((9.72 \times [O_X]_{\text{measured}})^{-1.0024})_{\text{ref\_std}}$  represent the standard deviation of  $\text{O}_X$  in the reaction and reference chambers, respectively, caused by the CAPS  $\text{NO}_2$  monitor with an integration time period of 100 s. Combined with the associated residence time  $\langle \tau \rangle$  under different flow rates, i.e.,  $\langle \tau \rangle$  was 0.16 h at a flow rate of  $2.1 \text{ L min}^{-1}$ . In our previous research (Hao et al., 2023), we evaluated the residence time error and determined it to be approximately 0.0015, when we considered this error in the calculation of ' $P(\text{O}_3)_{\text{net\_error}}$ ', we observed a minimal reduction in the ' $P(\text{O}_3)_{\text{net\_error}}$ ' values, ranging from 0 to 4% [0.25-0.75 percentile]. This impact is considered negligible in relation to the overall ' $P(\text{O}_3)_{\text{net\_error}}$ ' as presented in Eq. S4. Consequently, we did not consider the uncertainty associated with the residence time in our calculations. We note that this collective measurement error of  $P(\text{O}_3)_{\text{net}}$  is referred to as the measurement precision of the NPOPR detection system, which is different with the measurement accuracy of the NPOPR detection system described above.

## **S2. HONO measurement and its corresponding error**

In this study, the  $\text{NO}_2^-$  values measured by 2060 Marga M were used as HONO values for model input. During the observation period, the daytime (6:00–18:00) average of  $\text{NO}_2^-$  values was  $0.5 \pm 0.5$  ppbv, with a maximum value of 2.8 ppbv. This value is consistent with observations from other studies in China. For example, measurements of HONO in urban Beijing from September 2015 to July 2016 showed that HONO concentrations were highest in autumn at  $2.3 \pm 1.8$  ppbv and lowest in winter at  $1.1 \pm 0.9$  ppbv (Wang et al., 2017). Measurements of HONO at a coastal site in Shenzhen in October 2019 reported a value of  $0.7 \pm 0.1$  ppbv (Zhang et al., 2024). Measurements at a site in the Bohai Sea during the autumn of 2018 showed an average HONO concentration of  $0.2 \pm 0.2$  ppbv, with a maximum value of 1.4 ppbv (Wen et al., 2019). However, previous studies have shown the HONO may be overestimated by MARGA due to aqueous phase formation of HONO from dissolved  $\text{NO}_2$  and  $\text{SO}_2$  at wetted denuder walls (Stieger et al., 2018; Spindler et al. 2003). The measurement error of HONO by MARGA was evaluated by Xu et al. (2019) and Spindler et al. (2003). In this study, we used the method proposed by Spindler et al. (2003) to evaluate measurement uncertainty of HONO database obtained by MARGA, and then checked its influence to the modelled  $P(\text{O}_3)_{\text{net}}$ . The overall artefact formation measurement error of HONO by MARGA is expressed as a sum in Eq. (S5):

$$[\text{HNO}_2]_{\text{art}} = 0.056[\text{NO}_2] + (0.0032/\text{ppb}) [\text{NO}_2][\text{SO}_2] \quad (\text{S5})$$

where 0.0032 is the reciprocal value of the slope of the straight line between the HNO<sub>2</sub> concentration corrected for the HNO<sub>2</sub> content in purified air, the mean NO<sub>2</sub> artefact and the concentration product of NO<sub>2</sub> and SO<sub>2</sub>. We further modelled  $P(\text{Ox})_{\text{net\_Case D4}}$  with the corrected HONO, and found that the corrected HONO could decrease the modelled  $P(\text{Ox})_{\text{net\_Case D4}}$  by 0-8%, as shown in Fig. S18. Therefore, we note that with the measurement error of HONO by MARGA, the modelling method may consistently underestimate the modelled  $P(\text{Ox})_{\text{net}}$  in all cases, and the  $P(\text{Ox})_{\text{net\_missing}}$  in our study should be regarded as the lower limit values.

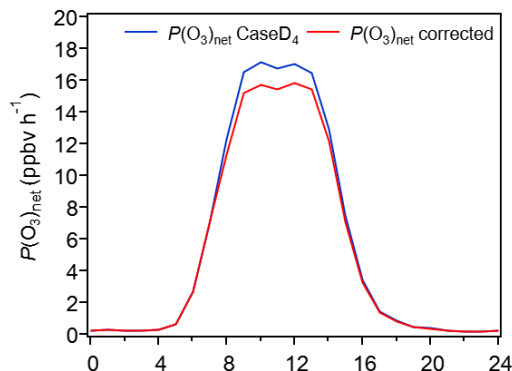

**Figure S18: The modelled  $P(\text{Ox})_{\text{net\_Case D4}}$  with and without the HONO correction.**

### **S3. Heterogeneous reactions of HO<sub>2</sub> and N<sub>2</sub>O<sub>5</sub> in the MCM v3.3.1 model**

The non-homogeneous loss rates ( $k$ ) of HO<sub>2</sub> and N<sub>2</sub>O<sub>5</sub> on aerosol surfaces are calculated using a simple approach based on first-order loss at the aerosol surface. The loss rate is calculated as follows:

$$k = \frac{\omega \cdot r_x \cdot S_a}{4} \quad (\text{S6})$$

$$S_a = \pi \int_0^\infty D_p^2 n_N(D_p) dD_p = \int_0^\infty n_s(D_p) dD_p \quad (\text{S7})$$

The molecular average velocity  $\omega$  (m s<sup>-1</sup>) is calculated using the formula:  $\omega = \frac{\sqrt{8RT}}{\pi M}$  where R is the universal gas

constant,  $T$  is the temperature, and  $M$  is the molecular weight of the gas.  $r_x$  represents the adsorption coefficient for HO<sub>2</sub> or N<sub>2</sub>O<sub>5</sub>, which in this study is based on the results from (Zhou et al., 2021), where  $\gamma_{\text{HO}_2} = 0.19$ .  $S_a$  represents the aerosol surface area (m<sup>2</sup> m<sup>-3</sup>),  $n_N(D_p)$  is the particle number concentration, and  $D_p$  is the particle diameter. Since the NPOPR sampler removes particles with diameters > 2 μm, only particles with diameters < 2 μm are considered in the model simulation for aerosol surface area.

$\text{Cl}\cdot$  is an important oxidant. A modeling study (Sarwar et al., 2014) demonstrated that incorporating  $\text{Cl}\cdot$  chemistry into models can increase the oxidative capacity of VOCs by more than 20 % in some regions. In the troposphere, one major source of  $\text{Cl}\cdot$  is the photolysis of nitryl chloride ( $\text{ClNO}_2$ ), which is formed from the heterogeneous reaction of  $\text{N}_2\text{O}_5$  with chloride particles at night.

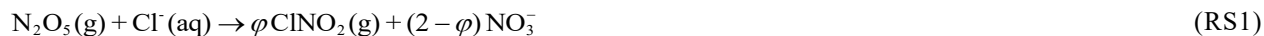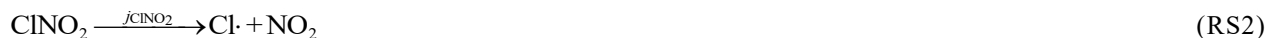

In the equation,  $\phi$  represents the yield of  $\text{ClNO}_2$ , which is based on the intermediate yield of  $\text{ClNO}_2$  ( $\phi \text{ClNO}_2 = 0.6$ ) used in Xue et al. (2014) study.

#### **S4. Modelling scenarios of Case A–D1**

Based on our previous study (Zhou et al., 2024a), this simulation adopted the same modelling scenarios (CaseA–D1) and further explored methods to compensate for the  $P(\text{O}_3)_{\text{net\_Missing}}$  (see Table S3). The simulation results indicate that compared to Case A, Case B (which incorporated the  $\text{HO}_2$  heterogeneous uptake mechanism) showed a 7.6 % decrease in simulated  $\text{HO}_2$  concentration (Figure S7 (d)), with a corresponding decrease of 0.6 ppbv  $\text{h}^{-1}$  (Figure S7 (b),  $\sim 4.9$  %) in averaged daytime  $P(\text{O}_3)_{\text{net\_Mod}}$ . Case C (which included dry deposition of trace gases and  $\text{N}_2\text{O}_5$  uptake) resulted in only 0.1 ppbv  $\text{h}^{-1}$  ( $\sim 1.1$  %) in  $P(\text{O}_3)_{\text{net\_Mod}}$  compared to Case A. Case D1 (which added the  $\text{ClNO}_2$  photolysis mechanism) exhibited negligible impact ( $\sim 0.0$  ppbv  $\text{h}^{-1}$ ), indicating that dry deposition and  $\text{Cl}\cdot$  chemistry had a minimal impact on  $P(\text{O}_3)_{\text{net\_Mod}}$  in this study.

#### **S5. Impacts of OVOCs constraints in the model**

To explore the impact of OVOCs constraint in the model, we further added a modelling scenario without OVOC constraints based on Case D1 and output key OVOC species (see Fig. S19). From Fig. S19, the model tends to overestimate some OVOC concentrations (i.e.,  $\text{HCHO}$ ,  $\text{CH}_3\text{CHO}$ ), and their secondary-formation pathways are adequately captured, while the observed diurnal variation of  $\text{CH}_3\text{COCH}_3$  does not exhibit clear secondary formation characteristics. These results show that directly constraining OVOC concentrations can fill the concentration gap in the model to match observed OVOC levels, but may mask deficiencies in the model's chemical mechanism and artificially suppress diagnostic signals of missing secondary formation pathways (i.e., the  $\text{RO}_2$ -to-OVOC reaction pathways). This will lead to the underestimation of the entire HOx-cycle oxidation rate, lowers the budgets of  $\text{OH}$ ,  $\text{O}_3$ , and  $\text{NO}_3$ , and subsequently the  $P(\text{O}_3)_{\text{net\_Mod}}$ . However, without any constraint, the model may overestimate the contribution from primary sources. Furthermore, our analysis indicates that the  $P(\text{O}_3)_{\text{net\_Missing}}$  is not likely caused by unaccounted secondary production (see Sect. 3.3). Until such mechanistic gaps are resolved, observational nudging of OVOCs remains a pragmatic compromise: it preserves concentration accuracy while curbing spurious chemical feedbacks.

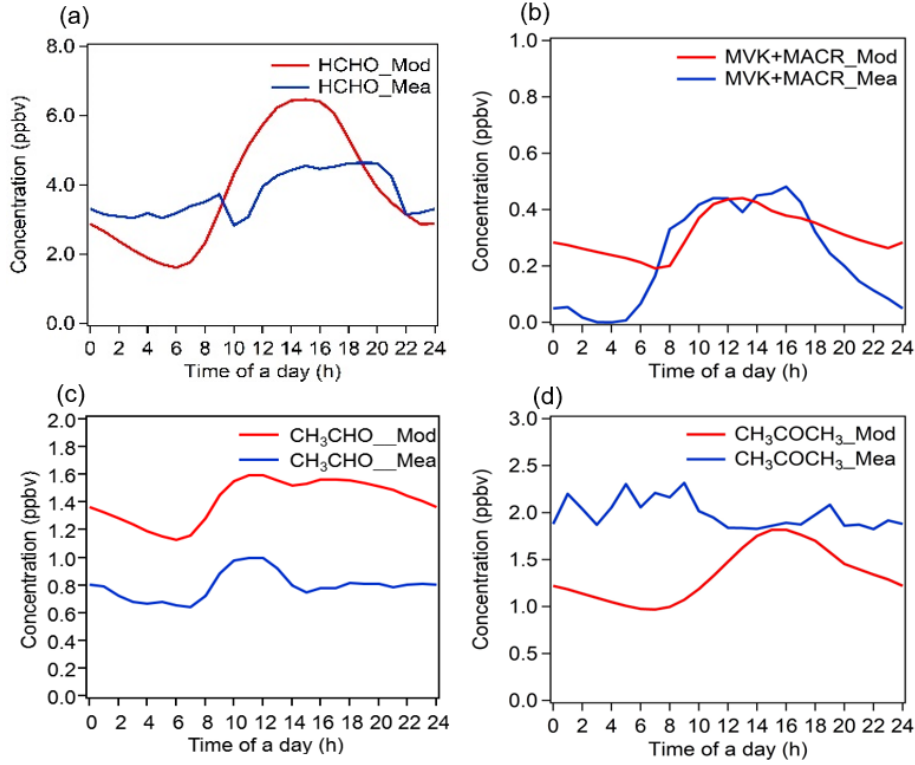

**Figure S19: Comparison of measured OVOCs with modeled values from a no-constraint OVOC scenario based on Case D1.**

### **S6. Chemical budgets of OH and HO<sub>2</sub>**

The chemical budget of OH and HO<sub>2</sub> can be analyzed using the OBM model outputs, which detail their generation and consumption pathways. According to the overview by Hao et al. (2023), the budget analysis of the production and consumption pathways for OH and HO<sub>2</sub> was conducted using the following equations:

$$P(\text{OH}) = 2k_{\text{O}^1\text{D}+\text{H}_2\text{O}}[\text{O}^1\text{D}][\text{H}_2\text{O}] + k_{\text{NO}+\text{HO}_2}[\text{NO}][\text{HO}_2] + j_{\text{HONO}}[\text{HONO}] \quad (\text{S8})$$

$$D(\text{OH}) = k_{\text{OH}+\text{NO}_2}[\text{OH}][\text{NO}_2] + k_{\text{OH}+\text{NO}}[\text{OH}][\text{NO}] + k_{\text{OH}+\text{CO}}[\text{OH}][\text{CO}] + \sum_i k_{\text{VOCs}_i+\text{OH}}[\text{VOCs}_i][\text{OH}]\varphi_i \quad (\text{S9})$$

$$P(\text{OH})_{\text{net}} = P(\text{OH}) - D(\text{OH}) \quad (\text{S10})$$

$$P(\text{HO}_2) = \sum_i k_{\text{VOCs}_i+\text{NO}_3}[\text{VOCs}_i][\text{NO}_3]\varphi_i + \sum_i k_{\text{VOCs}_i+\text{OH}}[\text{VOCs}_i][\text{OH}]\varphi_i + \sum_i j_{\text{VOCs}_i}[\text{OVOCs}_i] + k_{\text{OH}+\text{CO}}[\text{OH}][\text{CO}] \quad (\text{S11})$$

$$D(\text{HO}_2) = k_{\text{HO}_2+\text{NO}}[\text{HO}_2][\text{NO}] \quad (\text{S12})$$

$$P(\text{HO}_2)_{\text{net}} = P(\text{HO}_2) - D(\text{HO}_2) \quad (\text{S13})$$

**Table S1.** Measurement details for different parameters at Guangdong Atmospheric Supersite of China.

| Parameters                 | Instrument Name                          | Country of manufacture | Instrument Model                     |
|----------------------------|------------------------------------------|------------------------|--------------------------------------|
| PM <sub>2.5</sub>          | Fengyue Aorui, PM <sub>2.5</sub> monitor | China                  | Fengyue Aorui-AR1000                 |
| O <sub>3</sub>             | Fengyue Aorui, Ozone analyzer            | China                  | Fengyue Aorui-1016                   |
| NO/NO <sub>2</sub>         | Fengyue Aorui, Nitrogen oxides Analyzer  | China                  | Fengyue Aorui-1014                   |
| SO <sub>2</sub>            | Fengyue Aorui, Sulfur dioxide Analyzer   | China                  | Fengyue Aorui-1032                   |
| CO                         | Fengyue Aorui, Carbon monoxide Analyzer  | China                  | Fengyue Aorui-1012                   |
| Photolysis rates           | Metcon, actinic flux spectrometer        | Germany                | $j_{\text{NO}_2}$ - $j_{\text{O}_3}$ |
| Particle size distribution | Particle size spectrometer               | China                  | TSI-3321, 3775, 3776                 |
| VOCs                       | Peng Yu Chang Ya, Online VOCs Monitor    | China                  | ZF-PKU-VOC1007/PTR-TOF-1000          |
| HCHO                       | SDL Technology, Formaldehyde analyzer    | China                  | Model 4050                           |
| NO <sub>2</sub> -(HONO)    | Mereohm Applikon                         | Switzerland            | 2060 Marga M                         |

Note: The actinic flux spectrometer measures eight types of photolysis rates ( $j_{\text{NO}_2}$ ,  $j_{\text{O}^1\text{D}}$ ,  $j_{\text{HONO}}$ ,  $j_{\text{H}_2\text{O}_2}$ ,  $j_{\text{NO}_3\text{-M}}$ ,  $j_{\text{NO}_3\text{-R}}$ ,  $j_{\text{HCHO-M}}$ , and  $j_{\text{HCHO-R}}$ ). Detailed information on the calibration and quality assurance of these instruments can be found in a previous study (Yan et al., 2022).



**Table S2.** List of photolysis rates obtained from direct measurements and the TUV Model.

| Species          | Source   | Species           | Source |
|------------------|----------|-------------------|--------|
| $j_{O^1D}$       | Measured | $j_{MEK}$         | TUV    |
| $j_{O_3}$        | TUV      | $j_{MVK}$         | TUV    |
| $j_{H_2O_2}$     | Measured | $j_{GLYOX\_1}$    | TUV    |
| $j_{NO_2}$       | Measured | $j_{GLYOX\_2}$    | TUV    |
| $j_{NO_3\_1}$    | Measured | $j_{GLYOX\_3}$    | TUV    |
| $j_{NO_3\_2}$    | Measured | $j_{MGLYOX}$      | TUV    |
| $j_{HONO}$       | Measured | $j_{BIACET}$      | TUV    |
| $j_{HNO_3}$      | TUV      | $j_{CH_3OOH}$     | TUV    |
| $j_{HCHO\_1}$    | Measured | $j_{C_2H_5NO_3}$  | TUV    |
| $j_{HCHO\_2}$    | Measured | $j_{C_2H_5NO_3}$  | TUV    |
| $j_{CH_3CHO}$    | TUV      | $j_{NC_3H_7NO_3}$ | TUV    |
| $j_{C_2H_5CHO}$  | TUV      | $j_{TC_4H_9NO_3}$ | TUV    |
| $j_{MACR}$       | TUV      | $j_{NOA}$         | TUV    |
| $j_{CH_3COCH_3}$ | TUV      | $j_{CLNO_2}$      | TUV    |

Note: The photolysis rates obtained from the TUV model were corrected for cloud shading scenarios by comparing the measured  $j_{NO_2}$  with the  $j_{NO_2}$  obtained from the TUV model.

**Table S3.** Description of different modelling scenarios and the parameter settings

| Case           | Description                                                                                                                                                                                                 | Parameter settings                                                                                           | references                                                                  |
|----------------|-------------------------------------------------------------------------------------------------------------------------------------------------------------------------------------------------------------|--------------------------------------------------------------------------------------------------------------|-----------------------------------------------------------------------------|
| A              | Ambient gases (NO, NO <sub>2</sub> , SO <sub>2</sub> , CO, O <sub>3</sub> ), HONO, 44 VOCs, meteorological parameters ( <i>T</i> , RH, <i>P</i> , BLH), photolysis rates, and O <sub>3</sub> dry deposition | O <sub>3</sub> (0.27 cm s <sup>-1</sup> )                                                                    | (Xue et al., 2014)                                                          |
|                | Case A with the addition of HO <sub>2</sub> uptake                                                                                                                                                          | $\gamma_{\text{HO}_2}=0.19$                                                                                  | (Zhu et al., 2020; Zhou et al., 2021)                                       |
| C              | Case B with the addition of trace gases (NO <sub>2</sub> , SO <sub>2</sub> , H <sub>2</sub> O <sub>2</sub> , HNO <sub>3</sub> , PAN, HCHO) dry deposition                                                   | NO <sub>2</sub> (0.6 cm s <sup>-1</sup> )                                                                    | (Zhang et al., 2003; Xue et al., 2014)                                      |
|                |                                                                                                                                                                                                             | SO <sub>2</sub> (0.8 cm s <sup>-1</sup> )                                                                    |                                                                             |
|                |                                                                                                                                                                                                             | H <sub>2</sub> O <sub>2</sub> (1.2 cm s <sup>-1</sup> )                                                      |                                                                             |
|                |                                                                                                                                                                                                             | HNO <sub>3</sub> (4.7 cm s <sup>-1</sup> )                                                                   |                                                                             |
|                |                                                                                                                                                                                                             | PAN (0.4 cm s <sup>-1</sup> )                                                                                |                                                                             |
| D <sub>1</sub> | Case C with the addition of N <sub>2</sub> O <sub>5</sub> non-homogeneous absorption reactions and ClNO <sub>2</sub> photolysis                                                                             | $\gamma_{\text{N}_2\text{O}_5}=0.02$                                                                         | (Xue et al., 2014; Badger et al., 2006; Xia et al., 2019; Xia et al., 2020) |
|                |                                                                                                                                                                                                             | $\phi_{\text{ClNO}_2}=0.6$                                                                                   |                                                                             |
| D <sub>2</sub> | Case D <sub>1</sub> with increased constraints for acetaldehyde, acrolein, acetone, and butanone                                                                                                            |                                                                                                              | ---                                                                         |
| D <sub>3</sub> | Case D <sub>1</sub> with increased constraints for all measurable OVOCs                                                                                                                                     | Constraints based on measurement data                                                                        | ---                                                                         |
| D <sub>4</sub> | Case D <sub>3</sub> with increased constraints for all measurable chlorinated VOCs                                                                                                                          |                                                                                                              | ---                                                                         |
| E <sub>1</sub> | Case D <sub>1</sub> with overall VOCs concentration in constraints increased                                                                                                                                | Increase based on the correlation between $P(\text{O}_3)_{\text{net\_Missing}}$ and $k_{\text{OH\_Missing}}$ | ---                                                                         |
| E <sub>2</sub> | Case D <sub>1</sub> with increased concentrations of ethylene and formaldehyde in constraints                                                                                                               |                                                                                                              | ---                                                                         |
| E <sub>3</sub> | Case D <sub>1</sub> with increased formaldehyde concentration in constraints                                                                                                                                |                                                                                                              | ---                                                                         |

Notes: Parameter values for modelling scenarios from Case A to Case D<sub>1</sub> are set the same as those in Zhou et al. (2024a).

**Table S4.** Measured VOCs concentrations during the observation periods at Guangdong Atmospheric Supersite of China (units:  $\mu\text{g m}^{-3}$ ).

| Chemicals                | Classification | Mean $\pm$ SD<br>( $\mu\text{g m}^{-3}$ ) | Chemicals               | Classification | Mean $\pm$ SD<br>( $\mu\text{g m}^{-3}$ ) |
|--------------------------|----------------|-------------------------------------------|-------------------------|----------------|-------------------------------------------|
| Acetylene                |                | $0.1 \pm 0.1$                             | Tetrahydrofuran*        | OVOCs          | $0.9 \pm 0.8$                             |
| Acetylene                | NMHC/ AVOCs    | $0.1 \pm 0.1$                             | tert-Butyl methyl ether | OVOCs          | $0.0 \pm 0.0$                             |
| Alkanes                  |                | $2.6 \pm 1.6$                             | Acetic acid**           | OVOCs          | $21.4 \pm 9.0$                            |
| Ethane                   | NMHC/ AVOCs    | $0.3 \pm 0.1$                             | Methanol**              | OVOCs          | $12.5 \pm 4.4$                            |
| Propane                  | NMHC/ AVOCs    | $0.4 \pm 0.3$                             | Formic acid**           | OVOCs          | $8.7 \pm 2.3$                             |
| Isobutane                | NMHC/ AVOCs    | $0.3 \pm 0.4$                             | Methyl vinyl ketone**   | OVOCs          | $0.5 \pm 0.3$                             |
| n-Butane                 | NMHC/ AVOCs    | $0.1 \pm 0.2$                             | Aromatics               |                | $2.7 \pm 1.8$                             |
| Cyclopentane*            | NMHC/ AVOCs    | $0.1 \pm 0.2$                             | Toluene                 | NMHC/ AVOCs    | $1.1 \pm 0.9$                             |
| 2-Methylbutane           | NMHC/ AVOCs    | $0.2 \pm 0.3$                             | Benzene                 | NMHC/ AVOCs    | $0.1 \pm 0.0$                             |
| Pentane                  | NMHC/ AVOCs    | $0.1 \pm 0.2$                             | Ethylbenzene            | NMHC/ AVOCs    | $0.2 \pm 0.2$                             |
| Cyclohexane              | NMHC/ AVOCs    | $0.0 \pm 0.1$                             | o-Xylene                | NMHC/ AVOCs    | $0.2 \pm 0.2$                             |
| 2,2-Dimethylbutane       | NMHC/ AVOCs    | $0.0 \pm 0.0$                             | Cumene                  | NMHC/ AVOCs    | $0.0 \pm 0.0$                             |
| 2,3-Dimethylbutane       | NMHC/ AVOCs    | $0.1 \pm 0.1$                             | N-Propylbenzene         | NMHC/ AVOCs    | $0.0 \pm 0.0$                             |
| 2-Methylpentane          | NMHC/ AVOCs    | $0.1 \pm 0.1$                             | 2-Ethyltoluene          | NMHC/ AVOCs    | $0.0 \pm 0.0$                             |
| 3- Methylpentane         | NMHC/ AVOCs    | $0.1 \pm 0.1$                             | 3-Ethyltoluene          | NMHC/ AVOCs    | $0.0 \pm 0.0$                             |
| Hexane                   | NMHC/ AVOCs    | $0.1 \pm 0.1$                             | Mesitylene              | NMHC/ AVOCs    | $0.0 \pm 0.0$                             |
| Methylcyclohexane*       | NMHC/ AVOCs    | $0.0 \pm 0.0$                             | 4-Ethyltoluene          | NMHC/ AVOCs    | $0.0 \pm 0.0$                             |
| 2,4-Dimethylpentane*     | NMHC/ AVOCs    | $0.0 \pm 0.0$                             | 1,2,4-Trimethylbenzene  | NMHC/ AVOCs    | $0.1 \pm 0.1$                             |
| 2-Methylhexane           | NMHC/ AVOCs    | $0.1 \pm 0.1$                             | 1,2,3-Trimethylbenzene  | NMHC/ AVOCs    | $0.0 \pm 0.0$                             |
| 3-Methylhexane           | NMHC/ AVOCs    | $0.1 \pm 0.1$                             | 1,3-Diethylbenzene*     | NMHC/ AVOCs    | $0.0 \pm 0.0$                             |
| Heptane                  | NMHC/ AVOCs    | $0.1 \pm 0.1$                             | 1,4- Diethylbenzene*    | NMHC/ AVOCs    | $0.0 \pm 0.0$                             |
| 2,2,4-Trimethylpentane*  | NMHC/ AVOCs    | $0.0 \pm 0.0$                             | P/m-Xylene              | NMHC/ AVOCs    | $0.6 \pm 0.5$                             |
| 2,3,4- Trimethylpentane* | NMHC/ AVOCs    | $0.0 \pm 0.0$                             | Styrene                 | NMHC/ AVOCs    | $0.1 \pm 0.2$                             |
| 2-Methylheptane*         | NMHC/ AVOCs    | $0.0 \pm 0.0$                             | Naphthalene*            | NMHC/ AVOCs    | $0.1 \pm 0.1$                             |
| 3- Methylheptane*        | NMHC/ AVOCs    | $0.0 \pm 0.0$                             | Halocarbons             |                | $3.0 \pm 1.7$                             |
| n-Octane                 | NMHC/ AVOCs    | $0.0 \pm 0.0$                             | Chloromethane           | AVOCs          | $0.1 \pm 0.0$                             |
| n-Nonane                 | NMHC/ AVOCs    | $0.0 \pm 0.0$                             | Dichloromethane         | AVOCs          | $1.3 \pm 0.9$                             |
| Decane                   | NMHC/ AVOCs    | $0.0 \pm 0.0$                             | Chloroform              | AVOCs          | $0.1 \pm 0.0$                             |
| n-Hendecane              | NMHC/ AVOCs    | $0.2 \pm 0.1$                             | Methyl bromide          | AVOCs          | $0.0 \pm 0.0$                             |

|                      |             |         |                                |       |         |
|----------------------|-------------|---------|--------------------------------|-------|---------|
| 2,3-Dimethylpentane* | NMHC/ AVOCs | 0.0±0.0 | Bromodichloromethane*          | AVOCs | 0.0±0.0 |
| Alkenes              |             | 0.2±0.3 | Dichlorodifluoromethane*       | AVOCs | 0.6±1.3 |
| Ethylene             | NMHC/ AVOCs | 0.1±0.1 | Bromoform*                     | AVOCs | 0.0±0.0 |
| Propylene            | NMHC/ AVOCs | 0.0±0.0 | Chlorodibromomethane*          | AVOCs | 0.0±0.0 |
| 1-Butene             | NMHC/ AVOCs | 0.0±0.0 | Trichlorofluoromethane*        | AVOCs | 0.1±0.0 |
| cis-2-Butene*        | NMHC/ AVOCs | 0.1±0.2 | Chloroethane                   | AVOCs | 0.0±0.0 |
| 2- Butene*           | NMHC/ AVOCs | 0.0±0.0 | 1,1-Dichloroethane             | AVOCs | 0.0±0.0 |
| Isoprene             | BVOCs       | 0.0±0.0 | 1,2-Dichloroethane             | AVOCs | 0.2±0.1 |
| 1-Pentene            | NMHC/ AVOCs | 0.0±0.0 | 1,2-Dibromoethane              | AVOCs | 0.0±0.0 |
| trans-2-Pentene      | NMHC/ AVOCs | 0.0±0.0 | 1,2-DichlorotetrafluoroethaneI | AVOCs | 0.0±0.0 |
| cis-2-Pentene        | NMHC/ AVOCs | 0.0±0.0 | 1,1,2,2-Tetrachloroethane*     | AVOCs | 0.0±0.0 |
| 1-Hexene             | NMHC/ AVOCs | 0.0±0.0 | Magnesia mixture*              | AVOCs | 0.1±0.0 |
| 1,3-Butadiene        | NMHC/ AVOCs | 0.0±0.0 | 1,1,1-Trichloroethane          | AVOCs | 0.0±0.0 |
| OVOCs                |             | 5.7±2.9 | 1,1,2-Trichloroethane          | AVOCs | 0.0±0.0 |
| Formaldehyde         | OVOCs       | 0.5±0.3 | 1,2-Dichloropropane            | AVOCs | 0.1±0.1 |
| Acetaldehyde         | OVOCs       | 0.1±0.1 | Vinyl chloride                 | AVOCs | 0.0±0.0 |
| Propionaldehyde      | OVOCs       | 0.0±0.0 | Vinylidene chloride            | AVOCs | 0.0±0.0 |
| Butyraldehyde        | OVOCs       | 0.0±0.0 | trans-1,2-Dichloroethylene     | AVOCs | 0.0±0.0 |
| Valeraldehyde        | OVOCs       | 0.0±0.1 | cis-1,2-Dichloroethylene       | AVOCs | 0.0±0.0 |
| Hexanal              | OVOCs       | 0.6±0.5 | Phenyl vinyl sulfone*          | AVOCs | 0.0±0.0 |
| Acrolein             | OVOCs       | 0.0±0.0 | Trichloroethylene              | AVOCs | 0.0±0.0 |
| Crotonaldehyde       | OVOCs       | 0.2±0.0 | Tetrachloroethylene            | AVOCs | 0.1±0.0 |
| Methacrolein         | OVOCs       | 0.0±0.0 | Hexachloro-1,3-butadiene*      | AVOCs | 0.1±0.1 |
| Benzaldehyde         | OVOCs       | 0.0±0.1 | Chlorobenzene*                 | AVOCs | 0.0±0.0 |
| Acetone              | OVOCs       | 0.5±0.3 | 1,2-Dichlorobenzene*           | AVOCs | 0.0±0.0 |
| 2-Butanone           | OVOCs       | 0.3±0.3 | 1,3-Dichlorobenzene*           | AVOCs | 0.0±0.0 |
| 4-Methyl-2-pentanone | OVOCs       | 0.0±0.0 | 1,4-Dichlorobenzene*           | AVOCs | 0.0±0.0 |
| 2-Hexanone           | OVOCs       | 1.3±1.3 | 1,2,4-Trichlorobenzene*        | AVOCs | 0.1±0.1 |
| 1,4-Dioxane*         | OVOCs       | 0.0±0.0 | Carbon tetrachloride*          | AVOCs | 0.1±0.0 |
| Vinyl acetate*       | OVOCs       | 0.0±0.0 | Other                          |       | 0.0±0.0 |
| Ethyl acetate Methyl | OVOCs       | 1.2±0.8 | Carbon disulfide*              | AVOCs | 0.0±0.0 |
| Methacrylate*        | OVOCs       | 0.0±0.0 | Dimethyl sulfide**             | AVOCs | 0.8±0.1 |

Note: VOC species not labeled in the table are measured by ZF-PKU-VOC1007 and are included in the observation data analysis;

VOC species labeled with “\*\*\*” are measured by PTR-TOF-1000, but these are not included in the total sum as they serve as supplementary inputs for the model; VOC species labeled with “\*\*” are not included in the MCM v3.3.1 chemical mechanism.

**Table S5.** The daytime average and standard deviation of pollutants and meteorological parameters during O<sub>3</sub> pollution days and normal days throughout the observation period (from October 4 to 26, 2023).

| Parameter                                            | Entire observation period | O <sub>3</sub> pollution days | Normal days      |
|------------------------------------------------------|---------------------------|-------------------------------|------------------|
| $j_{\text{NO}_2} (\times 10^{-3} \text{ s}^{-1})$    | $3.1 \pm 2.6$             | $3.7 \pm 2.6$                 | $2.7 \pm 2.5$    |
| T (°C)                                               | $28.1 \pm 4.5$            | $32.0 \pm 3.5$                | $31.5 \pm 5.1$   |
| RH (%)                                               | $64.9 \pm 16.6$           | $55.5 \pm 11.2$               | $63.2 \pm 14.4$  |
| NO (ppbv)                                            | $3.1 \pm 4.2$             | $4.3 \pm 6.4$                 | $2.6 \pm 3.0$    |
| NO <sub>2</sub> (ppbv)                               | $13.4 \pm 6.0$            | $15.4 \pm 8.0$                | $12.8 \pm 5.0$   |
| O <sub>3</sub> (ppbv)                                | $39.8 \pm 31.3$           | $63.2 \pm 37.6$               | $30.9 \pm 22.9$  |
| TVOCs (μg m <sup>-3</sup> )                          | $13.2 \pm 7.1$            | $13.8 \pm 8.4$                | $13.1 \pm 6.7$   |
| $P(\text{O}_3)_{\text{net}}$ (ppbv h <sup>-1</sup> ) | $9.7 \pm 7.4$             | $14.4 \pm 13.8$               | $7.1 \pm 9.4$    |
| CO (ppmv)                                            | $0.6 \pm 0.1$             | $0.5 \pm 0.1$                 | $0.6 \pm 0.10$   |
| PM <sub>2.5</sub> (μg m <sup>-3</sup> )              | $28.1 \pm 13.4$           | $41.0 \pm 10.9$               | $23.4 \pm 11.3$  |
| Wind speed (m s <sup>-1</sup> )                      | $3.4 \pm 1.5$             | $2.5 \pm 1.2$                 | $3.8 \pm 1.3$    |
| Wind direction (° )                                  | $80.7 \pm 110.1$          | $76.1 \pm 52.9$               | $80.8 \pm 125.5$ |

**Table S6.** Maximum measured  $P(\text{O}_3)_{\text{net}}$  values based on dual-reaction chamber technique in literatures.

| Measurement site   | Site type | Study period           | $P(\text{O}_3)_{\text{net}}$ (ppbv h <sup>-1</sup> ) | References                |
|--------------------|-----------|------------------------|------------------------------------------------------|---------------------------|
| USA - Houston      | Urban     | April-May 2009         | 100                                                  | (Cazorla et al., 2012)    |
| USA - Bloomington  | Suburban  | May 2010               | ~30                                                  | (Sklaveniti et al., 2018) |
| USA - Houston      | Urban     | September-October 2013 | 40~50                                                | (Baier et al., 2015)      |
| USA - Golden       | Urban     | Summer 2014            | ~30                                                  | (Baier et al., 2017)      |
| Japan - Kosakakuri | Forest    | August 2014            | 10.5                                                 | (Sadanaga et al., 2017)   |
| China - Lhasa      | Urban     | June 2021              | 30.9                                                 | (Chen et al., 2024)       |
| China - Beijing    | Urban     | June 2021              | 42.7                                                 | (Chen et al., 2024)       |
| China - Shenzhen   | Urban     | December 2021          | 34.1                                                 | (Hao et al., 2023)        |
| China - Hefei      | Suburban  | September-October 2022 | 27.8                                                 | (Tong et al., 2025)       |
| China - Dongguan   | Urban     | March 2023             | 46.3                                                 | (Zhou et al., 2024b)      |
| China - Jiangmen   | Rural     | October 2023           | 53.7                                                 | This study                |

**Table S7.** The daytime mean of  $P(O_3)_{net}$  in all modelling scenarios, their simulation deviations, and the IOA between the  $P(O_3)_{net\_Mea}$  and  $P(O_3)_{net\_Mod}$ .

| Modelling cases | Daytime mean $P(O_3)_{net}$<br>(ppbv h <sup>-1</sup> ) | Relative deviation*<br>(%) | IOA <sub>1</sub> | IOA <sub>2</sub> | R    | MB<br>(ppbv h <sup>-1</sup> ) | NMB<br>(%) | RMSE<br>(ppbv h <sup>-1</sup> ) | MFB<br>(%) | MFE (%) |
|-----------------|--------------------------------------------------------|----------------------------|------------------|------------------|------|-------------------------------|------------|---------------------------------|------------|---------|
| Measured        | 13.0±9.8                                               | ---                        | ---              | ---              | ---  | ---                           | ---        | ---                             | ---        | ---     |
| A               | 10.4±6.6                                               | 20.3                       | 0.66             | 0.87             | 0.98 | -2.4                          | -24.9      | 7.0                             | -3.1       | 53.8    |
| B               | 9.7±6.2                                                | 25.2                       | 0.66             | 0.86             | 0.84 | -2.9                          | -29.4      | 7.2                             | -1.7       | 55.0    |
| C               | 9.6±6.2                                                | 26.3                       | 0.66             | 0.86             | 0.84 | -3.0                          | -30.5      | 7.2                             | -1.7       | 55.5    |
| D <sub>1</sub>  | 9.6±6.2                                                | 26.3                       | 0.66             | 0.86             | 0.84 | -3.0                          | -30.5      | 7.2                             | -1.7       | 55.5    |
| D <sub>2</sub>  | 9.56±6.1                                               | 26.6                       | 0.66             | 0.86             | 0.85 | -3.0                          | -30.5      | 7.2                             | -12.6      | 55.6    |
| D <sub>3</sub>  | 10.0±6.2                                               | 23.0                       | 0.66             | 0.87             | 0.84 | -2.6                          | -26.1      | 7.0                             | -9.9       | 52.9    |
| D <sub>4</sub>  | 10.1±6.3                                               | 22.2                       | 0.66             | 0.87             | 0.84 | -2.5                          | -25.3      | 7.0                             | -8.9       | 52.6    |
| E <sub>1</sub>  | 11.7±7.5                                               | 10.3                       | 0.64             | 0.92             | 0.72 | -1.4                          | -8.9       | 6.1                             | 4.1        | 25.4    |
| E <sub>2</sub>  | 10.8±6.9                                               | 17.2                       | 0.64             | 0.89             | 0.71 | -2.2                          | -14.8      | 6.7                             | -4.1       | 26.9    |
| E <sub>3</sub>  | 12.4±8.0                                               | 5.1                        | 0.64             | 0.92             | 0.72 | -0.7                          | -4.4       | 6.1                             | 8.8        | 25.5    |

Notes: \*Calculated from the following equation:  $\frac{P(O_3)_{net\_missing}}{P(O_3)_{net\_mea}} \times 100\%$  ; IOA<sub>1</sub> represents the Index of Agreement for O<sub>3</sub>, while the other evaluation metrics (IOA<sub>2</sub>, R, MB, NMB, RMSE, MFB, MFE) are used to assess  $P(O_3)_{net}$ . The mean  $P(O_3)_{net}$  values for both  $P(O_3)_{net\_Mea}$  and  $P(O_3)_{net\_Mod}$  excluding rainy days.

Overall, Case E<sub>1</sub>–E<sub>3</sub> significantly improve the simulation accuracy of  $P(O_3)_{net}$  and reduce simulation bias by optimizing model mechanisms, particularly in terms of MB, NMB, and RMSE. Although the R slightly decreases, the overall simulation performance is superior to other scenarios.



**Table S8.** List of input VOC species for the different modelling scenarios

| Species            | Name in MCM Mechanism | Constrained Scenarios | Species                   | Name in MCM Mechanism | Constrained Scenarios                |
|--------------------|-----------------------|-----------------------|---------------------------|-----------------------|--------------------------------------|
| Acetylene          | C2H2                  | All Cases             | 4-Methyl-2-pentanone      | MIBK                  | Case D <sub>3</sub> , D <sub>4</sub> |
| Ethane             | C2H6                  | All Cases             | 2-Hexanone                | HEX2ONE               | Case D <sub>3</sub> , D <sub>4</sub> |
| Propane            | C3H8                  | All Cases             | Methyl tert-butyl ether   | MTBE                  | Case D <sub>3</sub> , D <sub>4</sub> |
| Isobutane          | IC4H10                | All Cases             | Toluene                   | TOLUENE               | All Cases                            |
| n-Butane           | NC4H10                | All Cases             | Benzene                   | BENZENE               | All Cases                            |
| Isopentane         | IC5H12                | All Cases             | Ethylbenzene              | EBENZ                 | All Cases                            |
| Pentane            | NC5H12                | All Cases             | o-Xylene                  | OXYL                  | All Cases                            |
| Cyclohexane        | CHEX                  | All Cases             | Cumene                    | IPBENZ                | All Cases                            |
| 2,2-Dimethylbutane | M22C4                 | All Cases             | n-Propylbenzene           | PBENZ                 | All Cases                            |
| 2,3-Dimethylbutane | M23C4                 | All Cases             | 1-Ethyl-2-methylbenzene   | OETHTOL               | All Cases                            |
| 2-Methylpentane    | M2PE                  | All Cases             | 1-Ethyl-3-methylbenzene   | METHTOL               | All Cases                            |
| 3-Methylpentane    | M3PE                  | All Cases             | 1,3,5-Trimethylbenzene    | TM135B                | All Cases                            |
| Hexane             | NC6H14                | All Cases             | 4-Ethyltoluene            | PETHTOL               | All Cases                            |
| 2-Methylhexane     | M2HEX                 | All Cases             | 1,2,4-Trimethylbenzene    | TM124B                | All Cases                            |
| 3-Methylhexane     | M3HEX                 | All Cases             | 1,2,3-Trimethylbenzene    | TM123B                | All Cases                            |
| Heptane            | NC7H16                | All Cases             | p/m-Xylene                | PXYL/MXYL             | All Cases                            |
| n-Octane           | NC8H18                | All Cases             | Styrene                   | STYRENE               | Case D <sub>3</sub> , D <sub>4</sub> |
| n-Nonane           | NC9H20                | All Cases             | Chloromethane             | CH3CL                 | Case D <sub>4</sub>                  |
| Decane             | NC10H22               | All Cases             | Dichloromethane           | CH2CL2                | Case D <sub>4</sub>                  |
| n-Hendecane        | NC11H24               | All Cases             | Chloroform                | CHCL3                 | Case D <sub>4</sub>                  |
| Ethylene           | C2H4                  | All Cases             | Methyl bromide            | CH3BR                 | Case D <sub>4</sub>                  |
| Propylene          | C3H6                  | All Cases             | Chloroethane              | CH3CH2CL              | Case D <sub>4</sub>                  |
| 1-Butene           | BUT1ENE               | All Cases             | 1,1-Dichloroethane        | CHCL2CH3              | Case D <sub>4</sub>                  |
| Isoprene           | C5H8                  | All Cases             | 1,2-Dichloroethane        | CH2CLCH2CL            | Case D <sub>4</sub>                  |
| 1-Pentene          | PENT1ENE              | All Cases             | 1,2-Dibromoethane         | DIBRET                | Case D <sub>4</sub>                  |
| trans-2-Pentene    | TPENT2ENE             | All Cases             | 1,1,2,2-Tetrachloroethane | CHCL2CHCL2            | Case D <sub>4</sub>                  |
| cis-2-Pentene      | CPENT2ENE             | All Cases             | 1,1,1-Trichloroethane     | CH3CCL3               | Case D <sub>4</sub>                  |
| 1-Hexene           | HEX1ENE               | All Cases             | 1,1,2-Trichloroethane     | CH2CLCHCL2            | Case D <sub>4</sub>                  |
| 1,3-Butadiene      | C4H6                  | All Cases             | 1,2-Dichloropropane       | CL12PROP              | Case D <sub>4</sub>                  |

|                 |                                    |                                                       |                            |                                   |                                      |
|-----------------|------------------------------------|-------------------------------------------------------|----------------------------|-----------------------------------|--------------------------------------|
| Formaldehyde    | HCHO                               | All Cases                                             | Vinyl chloride             | VINCL                             | Case D <sub>4</sub>                  |
| Acetaldehyde    | CH <sub>3</sub> CHO                | Case D <sub>2</sub> , D <sub>3</sub> , D <sub>4</sub> | 1,1-Dichloroethylene       | CCL <sub>2</sub> CH <sub>2</sub>  | Case D <sub>4</sub>                  |
| Propionaldehyde | C <sub>2</sub> H <sub>5</sub> CHO  | Case D <sub>3</sub> , D <sub>4</sub>                  | trans-1,2-Dichloroethylene | TDICLETH                          | Case D <sub>4</sub>                  |
| Butyraldehyde   | C <sub>3</sub> H <sub>7</sub> CHO  | Case D <sub>3</sub> , D <sub>4</sub>                  | cis-1,2-Dichloroethylene   | CDICLETH                          | Case D <sub>4</sub>                  |
| Valeraldehyde   | C <sub>4</sub> H <sub>9</sub> CHO  | Case D <sub>3</sub> , D <sub>4</sub>                  | Trichloroethylene          | TRICLETH                          | Case D <sub>4</sub>                  |
| Hexanal         | C <sub>5</sub> H <sub>11</sub> CHO | Case D <sub>3</sub> , D <sub>4</sub>                  | Tetrachloroethylene        | TCE                               | Case D <sub>4</sub>                  |
| Acrolein        | ACR                                | Case D <sub>2</sub> , D <sub>3</sub> , D <sub>4</sub> | Acetic acid                | CH <sub>3</sub> CO <sub>2</sub> H | Case D <sub>3</sub> , D <sub>4</sub> |
| Crotonaldehyde  | C <sub>4</sub> ALDB                | Case D <sub>3</sub> , D <sub>4</sub>                  | Methanol                   | CH <sub>3</sub> OH                | Case D <sub>3</sub> , D <sub>4</sub> |
| Methacrolein    | MACR                               | Case D <sub>3</sub> , D <sub>4</sub>                  | Formic acid                | HCOOH                             | Case D <sub>3</sub> , D <sub>4</sub> |
| Benzaldehyde    | BENZAL                             | Case D <sub>3</sub> , D <sub>4</sub>                  | Methyl vinyl ketone        | MVK                               | Case D <sub>3</sub> , D <sub>4</sub> |
| Acetone         | CH <sub>3</sub> COCH <sub>3</sub>  | Case D <sub>2</sub> , D <sub>3</sub> , D <sub>4</sub> | Dimethyl sulfide           | DMS                               | Case D <sub>3</sub> , D <sub>4</sub> |
| 2-Butanone      | MEK                                | Case D <sub>2</sub> , D <sub>3</sub> , D <sub>4</sub> | Ethyl acetate              | ETHACET                           | Case D <sub>3</sub> , D <sub>4</sub> |

## References

- Badger, C. L., Griffiths, P. T., George, I., Abbatt, J. P., and Cox, R. A.: Reactive uptake of N<sub>2</sub>O<sub>5</sub> by aerosol particles containing mixtures of humic acid and ammonium sulfate, *The Journal of Physical Chemistry A*, 110, 6986-6994, doi:10.1021/jp0562678, 2006.
- Baier, B. C., Brune, W. H., Lefer, B. L., Miller, D. O., and Martins, D. K.: Direct ozone production rate measurements and their use in assessing ozone source and receptor regions for Houston in 2013, *Atmospheric Environment*, 114, 83-91, doi:10.1016/j.atmosenv.2015.05.033, 2015.
- Baier, B. C., Brune, W. H., Miller, D. O., Blake, D., Long, R., Wisthaler, A., Cantrell, C., Fried, A., Heikes, B., and Brown, S.: Higher measured than modeled ozone production at increased NO<sub>x</sub> levels in the Colorado Front Range, *Atmospheric Chemistry and Physics*, 17, 11273-11292, doi:10.5194/acp-17-11273-2017, 2017.
- Cazorla, M., Brune, W., Ren, X., and Lefer, B.: Direct measurement of ozone production rates in Houston in 2009 and comparison with two estimation methods, *Atmospheric Chemistry and Physics*, 12, 1203-1212, doi:10.5194/acp-12-1203-2012, 2012.
- Chen, Y., Chi, S., Wang, Y., Guo, S., Zhang, C., Ye, C., and Lin, W.: Ozone production sensitivity in the highland city of Lhasa: a comparative analysis with Beijing, *Air Quality, Atmosphere & Health*, 1-11, <http://doi.org/10.1007/s11869-024-01604-4>, 2024.
- Hao, Y., Zhou, J., Zhou, J.-P., Wang, Y., Yang, S., Huangfu, Y., Li, X.-B., Zhang, C., Liu, A., and Wu, Y.: Measuring and

modeling investigation of the net photochemical ozone production rate via an improved dual-channel reaction chamber technique, *Atmospheric Chemistry and Physics*, 23, 9891-9910, doi:10.5194/acp-23-9891-2023, 2023.

Sadanaga, Y., Kawasaki, S., Tanaka, Y., Kajii, Y., and Bandow, H.: New system for measuring the photochemical ozone production rate in the atmosphere, *Environmental science & technology*, 51, 2871-2878, doi:10.1021/acs.est.6b04639, 2017.

Sarwar, G., Simon, H., Xing, J., and Mathur, R.: Importance of tropospheric ClNO<sub>2</sub> chemistry across the Northern Hemisphere, *Geophysical Research Letters*, 41, 4050-4058, doi:10.1002/2014GL059962, 2014.

Sklaveniti, S., Locoge, N., Stevens, P. S., Wood, E., Kundu, S., and Dusanter, S.: Development of an instrument for direct ozone production rate measurements: Measurement reliability and current limitations, *Atmospheric Measurement Techniques*, 11, 741-761, doi:10.1029/98jd00349, 2018.

Spindler, G., Hesper, J., Brüggemann, E., Dubois, R., Müller, T., and Herrmann, H.: Wet annular denuder measurements of nitrous acid: laboratory study of the artefact reaction of NO<sub>2</sub> with S(IV) in aqueous solution and comparison with field measurements: *Atmospheric Environment*, 37, 2643, doi:10.1016/S1352.2310(03)00209.7, 2003.

Stieger, B., Spindler, G., Fahlbusch, B., Müller, K., Grüner, A., Poulain, L., Thöni, L., Seitler, E., Wallasch, M., and Herrmann, H.: Measurements of PM<sub>10</sub> ions and trace gases with the online system MARGA at the research station Melpitz in Germany – A five-year study, *Journal of Atmospheric Chemistry*, 75, 33–70, doi.org/10.1007/s10874-017-9361-0, 2018.

Tong, J., Hu, R., Hu, C., Liu, X., Cai, H., Lin, C., Zhong, L., Wang, J., and Xie, P.: Development of a net ozone production rate detection system based on dual-channel cavity ring-down spectroscopy, *Journal of Environmental Sciences*, 149, 419-430, doi:10.1016/j.jes.2024.01.035, 2025.

Wang, J., Zhang, X., Guo, J., Wang, Z., and Zhang, M.: Observation of nitrous acid (HONO) in Beijing, China: Seasonal variation, nocturnal formation and daytime budget, *Science of the Total Environment*, 587, 350-359, doi:10.1016/j.scitotenv.2017.02.159, 2017.

Xu, Z., Liu, Y., Nie, W., Sun, P., Chi, X., and Ding, A.: Evaluating the measurement interference of wet rotating-denuder-ion chromatography in measuring atmospheric HONO in a highly polluted area: *Atmospheric Measurement Techniques*, 12, 6737–6748, doi:10.5194/amt.12.6737, 2019.

Wen, L., Chen, T., Zheng, P., Wu, L., Wang, X., Mellouki, A., Xue, L., and Wang, W.: Nitrous acid in marine boundary layer over eastern Bohai Sea, China: Characteristics, sources, and implications, *Science of the total environment*, 670, 282-291, doi:10.1016/j.scitotenv.2019.03.225, 2019.

Xia, M., Peng, X., Wang, W., Yu, C., Sun, P., Li, Y., Liu, Y., Xu, Z., Wang, Z., and Xu, Z.: Significant production of ClNO<sub>2</sub> and possible source of Cl<sub>2</sub> from N<sub>2</sub>O<sub>5</sub> uptake at a suburban site in eastern China, *Atmospheric Chemistry and Physics*, 20, 6147-6158, doi:10.5194/egusphere-egu2020-12946, 2020.

Xia, M., Wang, W., Wang, Z., Gao, J., Li, H., Liang, Y., Yu, C., Zhang, Y., Wang, P., and Zhang, Y.: Heterogeneous uptake of N<sub>2</sub>O<sub>5</sub> in sand dust and urban aerosols observed during the dry season in Beijing, *Atmosphere*, 10, 204, doi:10.3390/atmos10040204, 2019.

Xue, L., Wang, T., Gao, J., Ding, A., Zhou, X., Blake, D., Wang, X., Saunders, S., Fan, S., and Zuo, H.: Ground-level ozone

in four Chinese cities: precursors, regional transport and heterogeneous processes, *Atmospheric Chemistry and Physics*, 14, 13175-13188, doi:10.5194/acp-14-13175-2014, 2014.

Yan, Z., Tao, Z., Yujun, L., Duohong, C., and Chengliu, L.: The characteristics and source of formaldehyde in the Pearl River Delta and its impact on ozone formation, *Environmental Chemistry*, 41, 2356-2363, doi: 10.7524/j.issn.0254-6108.2021112906, 2022.

Zhang, G., Hu, R., Xie, P., Hu, C., Liu, X., Zhong, L., Cai, H., Zhu, B., Xia, S., and Huang, X.: Intensive photochemical oxidation in the marine atmosphere: evidence from direct radical measurements, *Atmospheric Chemistry and Physics*, 24, 1825-1839, doi:10.5194/acp-24-1825-2024, 2024.

Zhang, L., Brook, J. R., and Vet, R.: A revised parameterization for gaseous dry deposition in air-quality models, *Atmospheric Chemistry and Physics*, 3, 2067-2082, doi:10.5194/acp-3-2067-2003, 2003.

Zhou, J., Sato, K., Bai, Y., Fukusaki, Y., Kousa, Y., Ramasamy, S., Takami, A., Yoshino, A., Nakayama, T., and Sadanaga, Y.: Kinetics and impacting factors of HO<sub>2</sub> uptake onto submicron atmospheric aerosols during the 2019 Air QUALity Study (AQUAS) in Yokohama, Japan, *Atmospheric Chemistry and Physics*, 21, 12243-12260, doi:10.5194/acp-21-12243-2021, 2021.

Zhou, J., Wang, W., Wang, Y., Zhou, Z., Lv, X., Zhong, M., Zhong, B., Deng, M., Jiang, B., and Luo, J.: Intercomparison of measured and modelled photochemical ozone production rates: Suggestion of chemistry hypothesis regarding unmeasured VOCs, *Science of The Total Environment*, 951, 175290, doi:10.1016/j.scitotenv.2024.175290, 2024a.

Zhou, J., Wang, W., Wang, Y., Zhou, Z., Lv, X., Zhong, M., Zhong, B., Deng, M., Jiang, B., Luo, J., Cai, J., Li, X.-B., Yuan, B., and Shao, M.: Intercomparison of measured and modelled photochemical ozone production rates: Suggestion of chemistry hypothesis regarding unmeasured VOCs, *Science of The Total Environment*, 951, 175290, doi:/10.1016/j.scitotenv.2024.175290, 2024b.

Zhu, J., Cheng, H., Peng, J., Zeng, P., Wang, Z., Lyu, X., and Guo, H.: O<sub>3</sub> photochemistry on O<sub>3</sub> episode days and non-O<sub>3</sub> episode days in Wuhan, Central China, *Atmospheric Environment*, 223, 117236, doi:10.1016/j.atmosenv.2019.117236, 2020.
